# Supplementary material for: Asymmetric synthesis of 4H-1,3-oxazines: enantioselective reductive cyclization of N-acylated β-amino enones with trichlorosilane catalyzed by chiral Lewis bases
Source: Royal Society of Chemistry journal article supplement (doi:10.1039/b905102c), 2009-01-01
Supplement: b905102c.pdf [file b905102c.pdf]

## Asymmetric Synthesis of 4*H*-1,3-Oxazines: Enantioselective Reductive Cyclization of *N*-Acylated $\beta$ -Amino Enones with Trichlorosilane Catalyzed by Chiral Lewis Bases

Masaharu Sugiura, Mako Kumahara and Makoto Nakajima

*Faculty of Medical and Pharmaceutical Sciences, Kumamoto University,  
5-1 Oe-honmachi, Kumamoto 862-0973, Japan*

### Supplementary Information

#### Table of Contents

|                                                                                 |      |
|---------------------------------------------------------------------------------|------|
| General Methods                                                                 | S-1  |
| Synthesis of $\beta$ -Amino Enones                                              | S-2  |
| Synthesis of <i>N</i> -Acylated $\beta$ -Amino Enones                           | S-3  |
| NOESY Correlations of Selected Compounds                                        | S-6  |
| The Reaction of <i>N</i> -Acylated $\beta$ -Amino Enone with HSiCl <sub>3</sub> | S-7  |
| Transformations of 4 <i>H</i> -1,3-Oxazine <b>2e</b>                            | S-13 |
| Determination of the Absolute Configuration of <b>2e</b>                        | S-15 |
| <sup>1</sup> H and <sup>13</sup> C NMR Spectra of 4 <i>H</i> -1,3-Oxazines      | S-16 |
| HPLC Traces of Optically Active Compounds                                       | S-22 |
| References                                                                      | S-31 |

#### General Methods

Melting points (mp) are uncorrected. <sup>1</sup>H and <sup>13</sup>C NMR spectra were measured in CDCl<sub>3</sub> with JEOL JNM-ECX400 spectrometer. Tetramethylsilane (TMS) ( $\delta = 0$  ppm) and CDCl<sub>3</sub> ( $\delta = 77.0$  ppm) served as internal standards for <sup>1</sup>H and <sup>13</sup>C NMR, respectively. Infrared spectra were recorded on JEOL JIR-6500W. Mass spectra were measured with JEOL JMS-DX303HF mass spectrometer. Optical rotations were recorded on JASCO P-1010 polarimeter. High-pressure liquid chromatography (HPLC) was performed on JASCO P-980 and UV-1575.

Thin-layer chromatography (TLC) analysis was carried out using Merck silica gel plates. Visualization was accomplished with UV light, phosphomolybdic acid and/or anisaldehyde. Column chromatography was performed using Kanto Chemical Silica Gel 60N (spherical, neutral, 63-210  $\mu$ m).

Dry dichloromethane (dehydrated) was purchased from Kanto Chemical and stored over 4Å MS prior to use. All other solvents were purified based on standard procedures.

Trichlorosilane was purchased from Tokyo Kasei Kogyo (TCI) and used without further purification. A dichloromethane solution (ca. 3 M) of this reagent was prepared and stocked in a screw-top test tube with a Teflon packing. (*S*)-BINAP dioxide (BINAPO) and other chiral phosphine oxides were prepared by oxidation of the corresponding phosphines with hydrogen peroxide in acetone.<sup>1</sup> (*R*)-BQNO was prepared according to the literature.<sup>2</sup> All other chemicals were purified based on standard procedures.

All reactions using trichlorosilane were performed under argon atmosphere using oven- and heating gun-dried glassware equipped with a rubber septum and a magnetic stirring bar. All glassware and syringes used for trichlorosilane were rinsed with ethanol and soaked in aqueous NaOH (ca. 1 M) for several hours and washed as usual.

### Synthesis of $\beta$ -Amino Enones

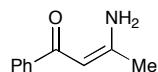

#### (*Z*)-3-Amino-1-phenylbut-2-en-1-one

The title compound was prepared according to the literature procedure with a slight modification.<sup>3</sup> A solution of 1-phenylbutane-1,3-dione (3.00 g, 18.5 mmol) and ammonium acetate (7.14 g, 92.4 mmol) in dry methanol (30 mL) was refluxed for 2.5 h. After cooling to room temperature, water (15 mL) was added and the mixture was stirred well. Precipitated colorless crystals were collected by filtration and dried at 50 °C under vacuum to give (*Z*)-3-amino-1-phenylbut-2-en-1-one (2.76 g, 93%). Spectroscopic data were consistent with the literature data.<sup>3</sup>

<sup>1</sup>H-NMR (400 MHz, CDCl<sub>3</sub>) δ 2.07 (s, 3H), 5.17 (brs, 1H), 5.75 (s, 1H), 7.39-7.48 (m, 3H), 7.86-7.90 (m, 2H), 10.21 (brs, 1H); <sup>13</sup>C-NMR (100 MHz, CDCl<sub>3</sub>) δ 22.9, 92.3, 127.1, 128.2, 130.8, 140.2, 162.8, 189.5.

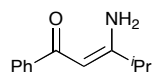

#### (*Z*)-3-Amino-4-methyl-1-phenylpent-2-en-1-one

A solution of 4-methyl-1-phenylpentane-1,3-dione<sup>4</sup> (2.27 g, 12.0 mmol) and ammonium acetate (4.62 g, 60 mmol) in dry methanol (23 mL) was refluxed for 3 h. After cooling to room temperature, water (15 mL) was added and the mixture was extracted with diethyl ether (3×). The combined organic layers were dried over anhydrous Na<sub>2</sub>SO<sub>4</sub>, filtered, and

concentrated under vacuum. The residue was purified by silica gel column chromatography (hexane/AcOEt = 4/1) to give the title compound (0.948 g, 42%) and a 79:21 mixture of the title compound and (Z)-1-amino-4-methyl-1-phenylpent-1-en-3-one (0.809 g, 36%).

**(Z)-3-Amino-4-methyl-1-phenylpent-2-en-1-one**

<sup>1</sup>H-NMR (400 MHz, CDCl<sub>3</sub>) δ 1.25 (d, *J* = 6.9 Hz, 6H), 2.47 (sept, *J* = 6.9 Hz, 1H), 5.24 (brs, 1H), 5.78 (s, 1H) 7.40-7.46 (m, 3H), 7.87-7.89 (m, 2H), 10.40 (brs, 1H).

**(Z)-1-Amino-4-methyl-1-phenylpent-1-en-3-one**

<sup>1</sup>H-NMR (400 MHz, CDCl<sub>3</sub>) δ 1.16 (d, *J* = 6.9 Hz, 6H), 2.61 (sept, *J* = 6.9 Hz, 1H), 5.24 (brs, 1H), 5.47 (s, 1H) 7.40-7.46 (m, 3H), 7.52-7.62 (m, 2H), 9.98 (brs, 1H).

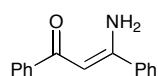

**(Z)-3-Amino-1,3-diphenylprop-2-en-1-one**

A solution of 1,3-diphenylpropane-1,3-dione (2.00 g, 9.0 mmol) and ammonium formate (2.80 g, 45 mmol) in dry ethanol (20 mL) was refluxed for 21.5 h. After cooling to room temperature, the mixture was concentrated under vacuum. Water was added to the residue and the mixture was extracted with AcOEt (3×). The combined organic layers were washed with saturated aqueous NaHCO<sub>3</sub> (2×) and brine (1×), dried over anhydrous Na<sub>2</sub>SO<sub>4</sub>, filtered, and concentrated under vacuum to give crude (Z)-3-amino-1,3-diphenylprop-2-en-1-one (2.017 g) which was used without further purification. Spectroscopic data were consistent with the literature data.<sup>5</sup>

<sup>1</sup>H-NMR (400 MHz, CDCl<sub>3</sub>) δ 5.45 (brs, 1H), 6.16 (s, 1H), 7.42-7.55 (m, 6H), 7.60-7.70 (m, 2H), 7.90-8.03 (m, 2H), 10.43 (brs, 1H); <sup>13</sup>C-NMR (100 MHz, CDCl<sub>3</sub>) δ 91.4, 126.2, 126.9, 128.1, 128.7, 130.4, 130.8, 137.1, 140.1, 163.0, 189.7.

**Synthesis of N-Acylated β-Amino Enones**

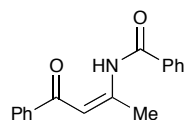

**N-((Z)-4-Oxo-4-phenylbut-2-en-2-yl)benzamide (1a)**

**Typical Procedure A:** Pyridine (0.44 mL, 2 equiv.) and benzoyl chloride (0.62 mL, 2 equiv.) were added successively to a solution of (Z)-3-amino-1-phenylbut-2-en-1-one (436.7 mg, 2.71 mmol) in dichloromethane (5.4 mL) at room temperature. After being stirred for 1 h, water was added and the mixture was extracted with AcOEt (3×). The combined organic layers were dried over anhydrous MgSO<sub>4</sub>, filtered, and concentrated under vacuum to give crude

crystals which was purified by recrystallization from ethanol/water (4/1) to afford **1a** as yellowish needles (the 1st crop: 554.4 mg, the 2nd crop: 81.5 mg; total 88%).

mp 108-110 °C; IR (KBr, cm<sup>-1</sup>) 3059, 1691, 1622, 1616, 1589, 1583, 1269, 1063, 702; <sup>1</sup>H-NMR (400 MHz, CDCl<sub>3</sub>) δ 2.69 (s, 3H), 6.19 (s, 1H), 7.48-7.61 (m, 6H), 7.93-7.98 (m, 2H), 8.09-8.13 (m, 2H), 13.82 (brs, 1H); <sup>13</sup>C-NMR (100 MHz, CDCl<sub>3</sub>) δ 22.8, 102.5, 127.7, 128.0, 128.6, 128.9, 132.4, 132.7, 133.7, 138.7, 158.2, 166.2, 191.9; Anal. Calcd. for C<sub>17</sub>H<sub>15</sub>NO<sub>2</sub>: C, 76.96; H, 5.70; N, 5.28; Found: C, 76.72; H, 5.83; N, 5.33.

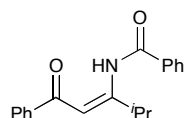

### ***N*-((*Z*)-4-Methyl-1-oxo-1-phenylpent-2-en-3-yl)benzamide (**1b**)**

According to Typical Procedure A, the reaction of (*Z*)-3-amino-4-methyl-1-phenylpent-2-en-1-one (473 mg, 2.5 mmol), pyridine (0.40 mL, 2 equiv.), and benzoyl chloride (0.56 mL, 2 equiv.) in dichloromethane (5 mL) at rt for 2.5 h gave the crude product. The crude product was diluted with dry dichloromethane (5 mL) and treated with diethylamine (0.45 mL) at rt for 9 h to remove excess benzoyl chloride. The mixture was concentrated under vacuum and the residue was purified by silica gel chromatography (hexane/AcOEt = 15/1) to afford **1b** as yellowish crystals (578 mg, 78%).

mp 80-81 °C; IR (KBr, cm<sup>-1</sup>) 2964, 1693, 1618, 1591, 1257, 1236, 712, 687; <sup>1</sup>H-NMR (400 MHz, CDCl<sub>3</sub>) δ 1.32 (d, *J* = 6.4 Hz, 6H), 4.24 (sept, *J* = 6.4 Hz, 1H), 6.36 (s, 1H) 7.48-7.67 (m, 6H), 7.93-8.02 (m, 2H), 8.12-8.20 (m, 2H), 13.87 (brs, 1H); <sup>13</sup>C-NMR (100 MHz, CDCl<sub>3</sub>) δ 21.6, 30.0, 97.7, 127.7, 128.0, 128.5, 128.8, 132.36, 132.41, 134.1, 139.1, 165.5, 168.4, 192.4; Anal. Calcd. for C<sub>19</sub>H<sub>19</sub>NO<sub>2</sub>: C, 77.79; H, 6.53; N, 4.77; Found: C, 77.87; H, 6.45; N, 4.81.

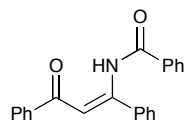

### ***N*-((*Z*)-3-Oxo-1,3-diphenylprop-1-en-1-yl)benzamide (**1c**)**

According to Typical Procedure A, the reaction of (*Z*)-3-amino-1,3-diphenylprop-2-en-1-one (970 mg, 4.0 mmol), pyridine (0.65 mL, 2 equiv.), and benzoyl chloride (0.92 mL, 2 equiv.) in dichloromethane (8 mL) at rt for 18.5 h gave the crude product. The crude product was diluted with dry dichloromethane (10 mL) and treated with diethylamine (0.83 mL) at rt for 1.5 h to remove excess benzoyl chloride. The mixture was concentrated under vacuum and

the residue was purified by silica gel chromatography (hexane/AcOEt = 15/1) to afford **1c** as yellowish oil which gradually crystallized on standing (1.133 g, 91%).

mp 118-119 °C; IR (KBr,  $\text{cm}^{-1}$ ) 3057, 1687, 1624, 1583, 1564, 1464, 1290, 1225, 1045, 719;  $^1\text{H-NMR}$  (400 MHz,  $\text{CDCl}_3$ )  $\delta$  6.46 (s, 1H), 7.42-7.64 (m, 11H), 7.97-8.04 (m, 2H), 8.08-8.13 (m, 2H), 13.36 (brs, 1H);  $^{13}\text{C-NMR}$  (100 MHz,  $\text{CDCl}_3$ )  $\delta$  105.2, 127.3, 127.8, 128.0 (2C), 128.6, 128.8, 129.7, 132.66, 132.69, 133.2, 136.3, 138.4, 157.0, 165.1, 191.9; Anal. Calcd. for  $\text{C}_{22}\text{H}_{17}\text{NO}_2$ : C, 80.71; H, 5.23; N, 4.28; Found: C, 80.39; H, 5.35; N, 4.26.

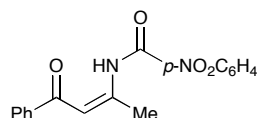

#### 4-Nitro-N-((Z)-4-oxo-4-phenylbut-2-en-2-yl)benzamide (**1d**)

According to Typical Procedure A, the reaction of (Z)-3-amino-1-phenylbut-2-en-1-one (322 mg, 2.0 mmol), pyridine (0.32 mL, 2 equiv.), and *p*-nitrobenzoyl chloride (742 mg, 2 equiv.) in dichloromethane (10 mL) at rt for 1 h gave the crude product which was purified by recrystallization from AcOEt to afford **1d** as orange needles (the 1st crop: 346 mg, 56%).

mp 196-197 °C; IR (KBr,  $\text{cm}^{-1}$ ) 3113, 1697, 1626, 1593, 1475, 1346, 1277, 710;  $^1\text{H-NMR}$  (400 MHz,  $\text{CDCl}_3$ )  $\delta$  2.67 (s, 3H), 6.27 (s, 1H), 7.48-7.61 (m, 3H), 7.93-7.99 (m, 2H), 8.24-8.30 (m, 2H), 8.35-8.42 (m, 2H), 14.05 (brs, 1H);  $^{13}\text{C-NMR}$  (100 MHz,  $\text{CDCl}_3$ )  $\delta$  22.5, 103.4, 124.1, 127.8, 128.7, 129.2, 132.9, 138.3, 139.2, 150.1, 157.4, 164.0, 192.2; Anal. Calcd. for  $\text{C}_{17}\text{H}_{14}\text{N}_2\text{O}_4$ : C, 65.80; H, 4.55; N, 9.03; Found: C, 65.57; H, 4.57; N, 9.01.

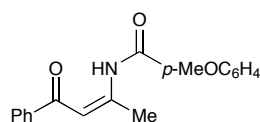

#### 4-Methoxy-N-((Z)-4-oxo-4-phenylbut-2-en-2-yl)benzamide (**1e**)

According to Typical Procedure A, the reaction of (Z)-3-amino-1-phenylbut-2-en-1-one (1.612 g, 10.0 mmol), pyridine (1.62 mL, 2 equiv.), and *p*-methoxybenzoyl chloride (2.71 mL, 2 equiv.) in dichloromethane (20 mL) at rt for 4 h gave the crude product which was purified by recrystallization from ethanol to afford **1e** as orange needles (the 1st crop: 2.1267 g, 72%).

mp 127-128 °C; IR (KBr,  $\text{cm}^{-1}$ ) 3001, 2970, 2943, 2841, 1687, 1606, 1498, 1477, 1273, 1246, 1178, 1061, 1032, 847, 758;  $^1\text{H-NMR}$  (400 MHz,  $\text{CDCl}_3$ )  $\delta$  2.67 (s, 3H), 3.89 (s, 3H), 6.15 (s, 1H), 6.99-7.05 (m, 2H), 7.45-7.60 (m, 3H), 7.92-7.98 (m, 2H), 8.06-8.12 (m, 2H), 13.82 (brs, 1H);  $^{13}\text{C-NMR}$  (100 MHz,  $\text{CDCl}_3$ )  $\delta$  22.7, 55.4, 102.1, 114.1, 126.0, 127.6, 128.6, 130.1, 132.3, 138.8, 158.6, 163.2, 165.7, 191.8; Anal. Calcd. for  $\text{C}_{18}\text{H}_{17}\text{NO}_3$ : C, 73.20; H, 5.80; N, 4.74; Found: C, 72.94; H, 5.82; N, 4.65.

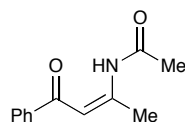

### ***N*-((*Z*)-4-Oxo-4-phenylbut-2-en-2-yl)acetamide (**1f**)**

According to Typical Procedure A, the reaction of (*Z*)-3-amino-1-phenylbut-2-en-1-one (806 mg, 5 mmol), pyridine (0.81 mL, 2 equiv.) and acetyl chloride (0.71 mL, 2 equiv.) in dichloromethane (10 mL) at rt for 20 h gave the crude product which was purified by recrystallization from ethanol/water (4/1) to afford **1f** as yellowish prisms (the 1st crop: 512 mg, the 2nd crop: 171 mg; total 67%).

mp 98-99 °C; IR (KBr, cm<sup>-1</sup>) 3072, 1711, 1616, 1585, 1560, 1502, 1473, 1439, 1308, 1261, 1200, 1086, 1065, 1003, 858, 777, 681; <sup>1</sup>H-NMR (400 MHz, CDCl<sub>3</sub>) δ 2.22 (s, 3H), 2.52 (s, 3H), 6.04 (s, 1H), 7.41-7.58 (m, 3H), 7.88-7.93 (m, 2H), 12.81 (brs, 1H); <sup>13</sup>C-NMR (100 MHz, CDCl<sub>3</sub>) δ 22.5, 25.4, 101.5, 127.6, 128.5, 132.4, 138.6, 157.5, 169.8, 191.4; Anal. Calcd. for C<sub>12</sub>H<sub>13</sub>NO<sub>2</sub>: C, 70.92; H, 6.45; N, 6.89; Found: C, 70.66; H, 6.50; N, 6.83.

### ***NOESY Correlations of Selected Compounds***

The geometry of selected β-amino enones was determined to be *Z* by observation of the NOESY correlations as shown below. That of other enones was determined by analogy.

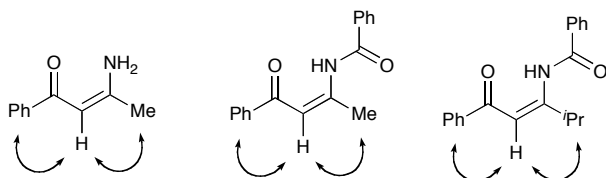

### The Reaction of *N*-Acylated $\beta$ -Amino Enone with $\text{HSiCl}_3$

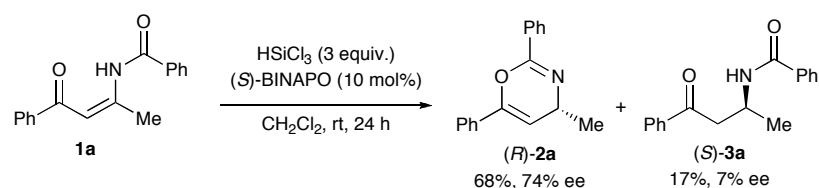

**Typical Procedure B:** To a solution of  $(S)$ -BINAPO (16.4 mg, 10 mol%) and **1a** (66.2 mg, 0.25 mmol) in dry dichloromethane (1 mL) was added dropwise trichlorosilane (ca. 3 M  $\text{CH}_2\text{Cl}_2$  solution, 3 equiv.) at 0 °C. The reaction was stirred at rt for 24 h and quenched with water (3 mL) and dichloromethane (5 mL). The mixture was stirred for 1 h, filtered through a Celite pad with dichloromethane and extracted with dichloromethane (3 $\times$ ). The combined organic layers were dried over anhydrous  $\text{Na}_2\text{SO}_4$ , filtered, evaporated, and purified by silica gel column chromatography (hexane/AcOEt = 20/1 ~ 2/1) to give 4*H*-1,3-oxazine **2a** [42.3 mg, 68%, 74% ee (*R*)] and keto amide **3a** [11.5 mg, 17%, 7% ee (*S*)].

The sense of the enantioselectivity of **2a** was found to be opposite to that of **3a** by transforming **2a** to **3a** with hydrobromic acid in ethanol. Their absolute configurations were tentatively assigned by analogy.

#### (*R*)-4-Methyl-2,6-diphenyl-4*H*-1,3-oxazine (**2a**)

Viscous oil; TLC:  $R_f$  0.68 (hexane/AcOEt = 3/1);  $[\alpha]_D^{28} +8.8$  (c 0.600,  $\text{CHCl}_3$ ) for 72% ee (*R*); IR (neat,  $\text{cm}^{-1}$ ) 3061, 2966, 1686, 1647, 1350, 1238, 1146, 1063, 760, 690;  $^1\text{H-NMR}$  (400 MHz,  $\text{CDCl}_3$ )  $\delta$  1.45 (d,  $J = 6.9$  Hz, 3H), 4.38 (dq,  $J = 6.9, 3.2$  Hz, 1H), 5.52 (d,  $J = 3.2$  Hz, 1H), 7.33-7.51 (m, 6H), 7.64-7.70 (m, 2H), 8.05-8.12 (m, 2H);  $^{13}\text{C-NMR}$  (100 MHz,  $\text{CDCl}_3$ )  $\delta$  25.0, 48.1, 102.3, 124.1, 127.3, 128.2, 128.5, 128.7, 130.8, 132.5, 133.0, 146.7, 152.0; HRMS (FAB) calcd. for  $\text{C}_{17}\text{H}_{16}\text{NO}$  ( $\text{M}+\text{H}^+$ ) 250.1232, found 250.1250; HPLC (CHIRALPAK AD-H, 0.46 cm $\phi$   $\times$  25cmL, hexane/2-propanol = 19/1, flow rate 1.0 mL/min, UV detection at 254 nm):  $t_R = 4.6$  min (*R*, major), 6.8 min (*S*, minor).

#### (*S*)-*N*-(4-Oxo-4-phenylbutan-2-yl)benzamide (**3a**)

Spectroscopic data were consistent with the literature data.<sup>6</sup>

Yellowish solid; TLC:  $R_f$  0.09 (hexane/AcOEt = 3/1);  $^1\text{H-NMR}$  (400 MHz,  $\text{CDCl}_3$ )  $\delta$  1.42 (d,  $J = 6.9$  Hz, 3H), 3.21 (dd,  $J = 17.0, 5.9$  Hz, 1H), 3.48 (dd,  $J = 17.0, 4.1$  Hz, 1H), 4.70 (dddq,  $J = 7.8, 5.9, 4.1, 6.9$  Hz, 1H), 7.06 (brd,  $J = 7.8$  Hz, 1H), 7.41-7.55 (m, 5H), 7.60 (apparent t,  $J = 7.8$  Hz, 1H), 7.78 (apparent d,  $J = 7.8$  Hz, 2H), 7.99 (apparent d,  $J = 7.8$  Hz, 2H); HPLC (CHIRALPAK AD-H, 0.46 cm $\phi$   $\times$  25cmL, hexane/2-propanol = 9/1, flow rate 1.0 mL/min, UV detection at 254 nm):  $t_R = 15.8$  min (*S*, major), 17.2 min (*R*, minor).

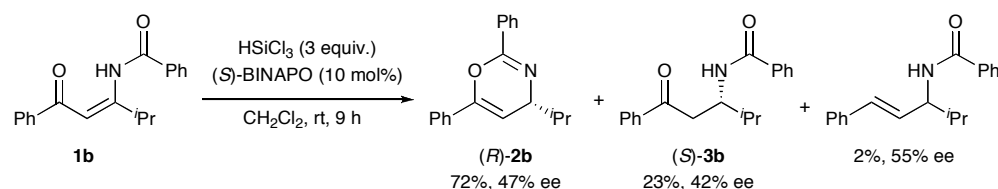

According to Typical Procedure B, the reaction of **1b** (73.6 mg, 0.25 mmol) and trichlorosilane (ca. 3 M  $\text{CH}_2\text{Cl}_2$  solution, 2 equiv.) with  $(S)$ -BINAPO (16.6 mg, 10 mol%) in dry dichloromethane (1 mL) at rt for 9 h gave  $4H$ -1,3-oxazine **2b** [49.8 mg, 72%, 47% ee ( $R$ )], keto amide **3b** [17.1 mg, 23%, 42% ee ( $S$ )] and an allylic amide (1.3 mg, 2%, 55% ee).

The sense of the enantioselectivity of **2b** was found to be same as that of **3b** by transforming **2b** to **3b** with hydrobromic acid in ethanol. Their absolute configurations were tentatively assigned by analogy.

#### **(R)-4-Isopropyl-2,6-diphenyl-4H-1,3-oxazine (2b)**

Viscous oil, TLC:  $R_f$  0.71 (hexane/AcOEt = 3/1);  $[\alpha]_D^{21} -1.2$  (c 1.115,  $\text{CHCl}_3$ ) for 47% ee ( $R$ ); IR (neat,  $\text{cm}^{-1}$ ) 2962, 1691, 1495, 1448, 1261, 762, 692;  $^1\text{H-NMR}$  (400 MHz,  $\text{CDCl}_3$ )  $\delta$  1.03 (d,  $J = 6.8$  Hz, 3H), 1.04 (d,  $J = 6.8$  Hz, 3H), 2.00 (d sept,  $J = 4.1, 6.8$  Hz, 1H), 4.20 (dd,  $J = 4.1, 3.7$  Hz, 1H), 5.47 (d,  $J = 3.7$  Hz, 1H), 7.36-7.50 (m, 6H), 7.65-7.72 (m, 2H), 8.06-8.11 (m, 2H);  $^{13}\text{C-NMR}$  (100 MHz,  $\text{CDCl}_3$ )  $\delta$  17.97, 18.05, 35.2, 57.9, 99.0, 124.1, 127.3, 128.2, 128.5, 128.7, 130.8, 132.6, 133.1, 147.8, 152.1; HRMS (FAB) calcd. for  $\text{C}_{19}\text{H}_{20}\text{NO}$  ( $\text{M}+\text{H}^+$ ) 278.1545, found 278.1581; HPLC (CHIRALPAK AD-H, 0.46 cm $\phi$   $\times$  25cmL, hexane/2-propanol = 49/1, flow rate 1.0 mL/min, UV detection at 254 nm):  $t_R = 5.0$  min ( $R$ , major), 7.0 min ( $S$ , minor).

#### **(S)-N-(4-Methyl-1-oxo-1-phenylpentan-3-yl)benzamide (3b)**

Yellowish solid; mp 129-131  $^\circ\text{C}$ ;  $R_f$  0.25 (hexane/AcOEt = 3/1);  $^1\text{H-NMR}$  (400 MHz,  $\text{CDCl}_3$ )  $\delta$  0.97 (d,  $J = 6.9$  Hz, 3H), 1.04 (d,  $J = 6.9$  Hz, 3H), 2.20 (d sept,  $J = 8.2, 6.9$  Hz, 1H), 3.22 (dd,  $J = 17.0, 5.0$  Hz, 1H), 3.49 (dd,  $J = 17.0, 5.0$  Hz, 1H), 4.33 (dddd,  $J = 9.2, 8.2, 5.0, 5.0$  Hz, 1H), 7.18 (brd,  $J = 9.2$  Hz, 1H), 7.40-7.53 (m, 6H), 7.59 (apparent t,  $J = 7.3$  Hz, 1H), 7.76-7.80 (m, 2H), 7.95-7.99 (m, 2H);  $^{13}\text{C-NMR}$  (100 MHz,  $\text{CDCl}_3$ )  $\delta$  19.52, 19.86, 31.0, 39.3, 52.7, 126.9, 128.06, 128.51, 128.74, 131.3, 133.5, 134.7, 136.8, 166.9, 200.0; HPLC (CHIRALPAK AD-H, 0.46 cm $\phi$   $\times$  25cmL, hexane/2-propanol = 19/1, flow rate 1.0 mL/min, UV detection at 254 nm):  $t_R = 26.0$  min ( $R$ , minor), 34.0 min ( $S$ , major).

#### **(E)-N-(4-Methyl-1-phenylpent-1-en-3-yl)benzamide**

Colorless solid;  $R_f$  0.38 (hexane/AcOEt = 3/1);  $^1\text{H-NMR}$  (400 MHz,  $\text{CDCl}_3$ )  $\delta$  1.03 (d,  $J = 6.9$  Hz, 6H), 2.02 (d sept,  $J = 6.9, 6.9$  Hz, 1H), 4.72 (ddd,  $J = 8.7, 6.9, 6.9$  Hz, 1H), 6.14 (brd,  $J = 8.7$  Hz, 1H), 6.21 (dd,  $J = 15.8, 6.9$  Hz, 1H), 6.60 (d,  $J = 15.8$  Hz, 1H), 7.20-7.58 (m, 8H), 7.79-7.83 (m, 2H); HPLC (CHIRALPAK AD-H, 0.46 cm $\phi$   $\times$  25cmL, hexane/2-propanol = 12/1, flow rate 1.0 mL/min, UV detection at 254 nm):  $t_R = 16.8$  min (minor), 21.6 min (major).



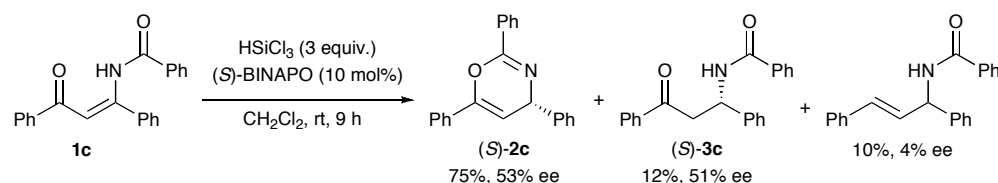

According to Typical Procedure B, the reaction of **1c** (81.6 mg, 0.25 mmol) and trichlorosilane (ca. 3 M  $\text{CH}_2\text{Cl}_2$  solution, 2 equiv.) with  $(S)$ -BINAPO (16.4 mg, 10 mol%) in dry dichloromethane (1 mL) at rt for 9 h gave  $4H$ -1,3-oxazine **2c** [58.5 mg, 75%, 53% ee ( $S$ )], keto amide **3c** [9.7 mg, 12%, 51% ee ( $S$ )] and an allylic amide (7.7 mg, 10%, 4% ee).

The sense of the enantioselectivity of **2c** was found to be same as that of **3c** by transforming **2c** to **3c** with hydrobromic acid in ethanol. The absolute configuration of **3c** was unequivocally determined on comparison with the literature data.<sup>7</sup> Thus, that of **2c** was also determined.

#### **(S)-2,4,6-Triphenyl-4H-1,3-oxazine (2c)**

Colorless solid; mp 96-97 °C; TLC:  $R_f$  0.63 (hexane/AcOEt = 3/1);  $[\alpha]_D^{19}$  -33.5 (c 1.075,  $\text{CHCl}_3$ ) for 53% ee ( $S$ ); IR (KBr,  $\text{cm}^{-1}$ ) 3088, 3061, 3028, 2862, 1687, 1647, 1495, 1450, 1319, 1240, 1119, 1070, 1024, 758, 696;  $^1\text{H-NMR}$  (400 MHz,  $\text{CDCl}_3$ )  $\delta$  5.44 (d,  $J = 3.7$  Hz, 1H), 5.65 (d,  $J = 3.7$  Hz, 1H), 7.23-7.32 (m, 1H), 7.34-7.55 (m, 10H), 7.68-7.73 (m, 2H), 8.10-8.17 (m, 2H);  $^{13}\text{C-NMR}$  (100 MHz,  $\text{CDCl}_3$ )  $\delta$  56.6, 100.8, 124.2, 127.28, 127.36, 127.48, 128.23, 128.51, 128.70, 128.95, 131.1, 132.4, 132.8, 144.4, 146.3, 152.2; HRMS (FAB) calcd. for  $\text{C}_{22}\text{H}_{18}\text{NO}$  ( $\text{M}+\text{H}^+$ ) 312.1388, found 312.1383; HPLC (CHIRALPAK AD-H, 0.46 cm $\phi$   $\times$  25cmL, hexane/2-propanol = 29/1, flow rate 1.0 mL/min, UV detection at 254 nm):  $t_R = 10.5$  min ( $S$ , major), 14.6 min ( $R$ , minor).

#### **(S)-N-(3-Oxo-1,3-diphenylpropyl)benzamide (3c)**

Spectroscopic data were consistent with the literature data.<sup>7</sup>

Colorless solid; TLC:  $R_f$  0.15 (hexane/AcOEt = 3/1);  $^1\text{H-NMR}$  (400 MHz,  $\text{CDCl}_3$ )  $\delta$  3.56 (dd,  $J = 17.0, 6.0$  Hz, 1H), 3.86 (dd,  $J = 17.0, 4.6$  Hz, 1H), 5.77 (ddd,  $J = 7.8, 6.0, 4.6$  Hz, 1H), 7.20-7.60 (m, 11H), 7.60 (brd,  $J = 7.8$  Hz, 1H), 7.83-7.87 (m, 2H), 7.91-7.95 (m, 2H); HPLC (CHIRALPAK AD-H, 0.46 cm $\phi$   $\times$  25cmL, hexane/2-propanol = 4/1, flow rate 1.0 mL/min, UV detection at 254 nm):  $t_R = 21.5$  min ( $R$ , minor), 28.7 min ( $S$ , major).

#### **N-(1,3-Diphenylallyl)benzamide**

Spectroscopic data were consistent with the literature data.<sup>8</sup>

Colorless solid; TLC:  $R_f$  0.39 (hexane/AcOEt = 3/1);  $^1\text{H-NMR}$  (400 MHz,  $\text{CDCl}_3$ )  $\delta$  6.04 (apparent t,  $J = 6.7$  Hz, 1H), 6.46 (dd,  $J = 16.0, 6.5$  Hz, 1H), 6.53 (brd,  $J = 7.8$  Hz, 1H), 6.62 (d,  $J = 16.0$  Hz, 1H), 7.21-7.54 (m, 13H), 7.81-7.86 (m, 2H); HPLC (CHIRALPAK AD-H, 0.46 cm $\phi$   $\times$  25cmL, hexane/2-propanol = 6/1, flow rate 1.0 mL/min, UV detection at 254 nm):  $t_R = 18.2$  min (minor), 20.2 min (major).

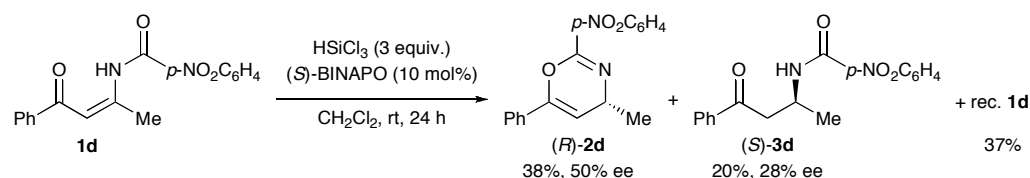

According to Typical Procedure B, the reaction of **1d** (78.1 mg, 0.25 mmol) and trichlorosilane (ca. 3 M  $\text{CH}_2\text{Cl}_2$  solution, 2 equiv.) with  $(S)$ -BINAPO (16.6 mg, 10 mol%) in dry dichloromethane (2 mL; **1d** was partially dissolved at the beginning) at rt for 24 h gave  $4H$ -1,3-oxazine **2d** [27.8 mg, 38%, 50% ee ( $R$ )] and keto amide **3d** [15.7 mg, 20%, 28% ee ( $S$ )]. **1d** was recovered in 37% (29.0 mg).

The sense of the enantioselectivity of **2d** was found to be opposite to that of **3d** by transforming **2d** to **3d** with hydrobromic acid in ethanol. Their absolute configurations were tentatively assigned by analogy.

#### **(R)-4-Methyl-2-(4-nitrophenyl)-6-phenyl-4H-1,3-oxazine (2d)**

Yellowish solid; mp 143-144 °C; TLC:  $R_f$  0.61 (hexane/AcOEt = 3/1);  $[\alpha]_D^{29} +5.8$  (c 1.170,  $\text{CHCl}_3$ ) for 61% ee ( $R$ ); IR (KBr,  $\text{cm}^{-1}$ ) 2974, 2929, 2848, 1689, 1649, 1601, 1522, 1340, 1244, 1146, 1093, 862, 760, 702;  $^1\text{H-NMR}$  (400 MHz,  $\text{CDCl}_3$ )  $\delta$  1.47 (d,  $J = 6.9$  Hz, 3H), 4.44 (dq,  $J = 6.9, 2.8$  Hz, 1H), 5.52 (d,  $J = 2.8$  Hz, 1H), 7.36-7.50 (m, 3H), 7.62-7.68 (m, 2H), 8.20-8.32 (m, 4H);  $^{13}\text{C-NMR}$  (100 MHz,  $\text{CDCl}_3$ )  $\delta$  25.0, 48.5, 102.2, 123.4, 124.1, 128.3, 128.6, 129.1, 132.5, 138.4, 146.7, 149.3, 150.3; HRMS (FAB) calcd. for  $\text{C}_{17}\text{H}_{15}\text{N}_2\text{O}_3$  ( $\text{M}+\text{H}^+$ ) 295.1083, found 295.1073; HPLC (CHIRALPAK AD-H, 0.46 cm $\phi$   $\times$  25cmL, hexane/2-propanol = 29/1, flow rate 1.0 mL/min, UV detection at 254 nm):  $t_R = 8.7$  min ( $R$ , major), 11.1 min ( $S$ , minor).

#### **(S)-4-Nitro-N-(4-oxo-4-phenylbutan-2-yl)benzamide (3d)**

Viscous oil; TLC:  $R_f$  0.11 (hexane/AcOEt = 3/1); IR (neat,  $\text{cm}^{-1}$ ) 3307, 3070, 2976, 1684, 1645, 1601, 1525, 1346, 1213, 1003, 870, 841, 754, 721, 690;  $^1\text{H-NMR}$  (400 MHz,  $\text{CDCl}_3$ )  $\delta$  1.44 (d,  $J = 6.9$  Hz, 3H), 3.25 (dd,  $J = 17.0, 5.5$  Hz, 1H), 3.48 (dd,  $J = 17.0, 4.1$  Hz, 1H), 4.71 (dddq,  $J = 7.8, 5.5, 4.1, 6.9$  Hz, 1H), 7.37 (brd,  $J = 7.8$  Hz, 1H), 7.50 (apparent t,  $J = 7.8$  Hz, 2H), 7.62 (apparent t,  $J = 7.3$  Hz, 1H), 7.95 (apparent d,  $J = 8.7$  Hz, 2H), 7.98 (apparent d,  $J = 8.0$  Hz, 2H), 8.28 (apparent d,  $J = 8.7$  Hz, 2H);  $^{13}\text{C-NMR}$  (100 MHz,  $\text{CDCl}_3$ )  $\delta$  20.0, 42.5, 43.2, 123.7, 128.09, 128.13, 128.81, 133.8, 136.7, 140.1, 149.5, 164.5, 199.8; HPLC (CHIRALPAK AD-H, 0.46 cm $\phi$   $\times$  25cmL, hexane/2-propanol = 9/1, flow rate 1.0 mL/min, UV detection at 254 nm):  $t_R = 28.1$  min ( $R$ , minor), 33.3 min ( $S$ , major).

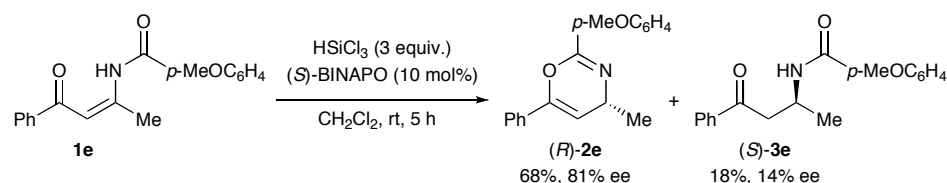

According to Typical Procedure B, the reaction of **1e** (73.8 mg, 0.25 mmol) and trichlorosilane (ca. 3 M  $\text{CH}_2\text{Cl}_2$  solution, 2 equiv.) with  $(S)$ -BINAPO (16.4 mg, 10 mol%) in dry dichloromethane (1 mL) at rt for 5 h gave  $4H$ -1,3-oxazine **2e** [47.2 mg, 68%, 81% ee ( $R$ )] and keto amide **3e** [13.7 mg, 18%, 14% ee ( $S$ )].

The sense of the enantioselectivity of **2e** was found to be opposite to that of **3e** by transforming **2e** to **3e** with hydrobromic acid in ethanol. The absolute configuration of **2e** was unequivocally determined as described later.

#### **(R)-2-(4-Methoxyphenyl)-4-methyl-6-phenyl-4H-1,3-oxazine (2e)**

Viscous oil; TLC:  $R_f$  0.40 (hexane/AcOEt = 3/1);  $[\alpha]_D^{30} +5.3$  (c 1.295,  $\text{CHCl}_3$ ) for 78% ee ( $R$ ); IR (neat,  $\text{cm}^{-1}$ ) 2966, 2926, 2837, 1689, 1608, 1512, 1250, 1169, 1146, 1068, 1030, 839, 760, 690;  $^1\text{H-NMR}$  (400 MHz,  $\text{CDCl}_3$ )  $\delta$  1.43 (d,  $J = 6.9$  Hz, 3H), 3.86 (s, 3H), 4.35 (dq,  $J = 6.9$ , 3.2 Hz, 1H), 5.51 (d,  $J = 3.2$  Hz, 1H), 6.94-6.96 (m, 2H), 7.36-7.42 (m, 3H), 7.66-7.68 (m, 2H), 8.01-8.03 (m, 2H);  $^{13}\text{C-NMR}$  (100 MHz,  $\text{CDCl}_3$ )  $\delta$  25.1, 48.0, 55.3, 102.4, 113.5, 124.1, 125.1, 128.45, 128.67, 128.93, 133.1, 146.7, 151.8, 161.7; HRMS (FAB) calcd. for  $\text{C}_{18}\text{H}_{18}\text{NO}_2$  ( $\text{M}+\text{H}^+$ ) 280.1338, found 280.1331; HPLC (CHIRALPAK AD-H, 0.46 cm $\phi$   $\times$  25cmL, hexane/2-propanol = 19/1, flow rate 1.0 mL/min, UV detection at 254 nm):  $t_R = 8.7$  min ( $R$ , major), 19.8 min ( $S$ , minor).

#### **(S)-4-Methoxy-N-(4-oxo-4-phenylbutan-2-yl)benzamide (3e)**

Yellowish solid; mp 119-121  $^\circ\text{C}$ ; TLC:  $R_f$  0.06 (hexane/AcOEt = 3/1); IR (KBr,  $\text{cm}^{-1}$ ) 3321, 3062, 2958, 1687, 1666, 1637, 1549, 1529, 756, 692;  $^1\text{H-NMR}$  (400 MHz,  $\text{CDCl}_3$ )  $\delta$  1.40 (d,  $J = 6.9$  Hz, 3H), 3.20 (dd,  $J = 16.8$ , 6.1 Hz, 1H), 3.47 (dd,  $J = 16.8$ , 4.0 Hz, 1H), 3.85 (s, 3H), 4.68 (dddq,  $J = 7.3$ , 6.1, 4.0, 6.9 Hz, 1H), 6.91 (apparent d,  $J = 8.9$  Hz, 2H), 6.96 (brd,  $J = 7.3$  Hz, 1H), 7.48 (apparent t,  $J = 7.3$  Hz, 2H), 7.58 (apparent t,  $J = 7.3$  Hz, 1H), 7.75 (apparent d,  $J = 8.9$  Hz, 2H), 7.99 (apparent d,  $J = 7.4$  Hz, 2H);  $^{13}\text{C-NMR}$  (100 MHz,  $\text{CDCl}_3$ )  $\delta$  20.1, 42.8, 43.3, 55.4, 113.7, 126.8, 128.1, 128.7 (2C), 133.5, 136.9, 162.1, 166.2, 199.7; HRMS (FAB) calcd. for  $\text{C}_{18}\text{H}_{20}\text{NO}_3$  ( $\text{M}+\text{H}^+$ ) 298.1443, found 298.1470; HPLC (CHIRALPAK AD-H, 0.46 cm $\phi$   $\times$  25cmL, hexane/2-propanol = 19/1, flow rate 1.0 mL/min, UV detection at 254 nm):  $t_R = 77.8$  min ( $S$ , major), 82.8 min ( $R$ , minor).

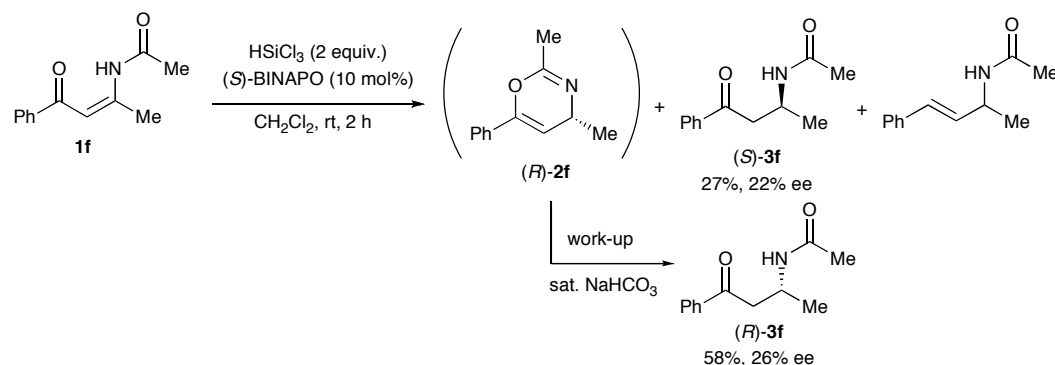

To a solution of  $(S)$ -BINAPO (16.3 mg, 10 mol%) and **1f** (50.9 mg, 0.25 mmol) in dry dichloromethane (2 mL) was added dropwise trichlorosilane (ca. 3 M  $\text{CH}_2\text{Cl}_2$  solution, 2 equiv.) at 0 °C. The reaction was stirred at rt for 2 h and quenched with water (3 mL) and dichloromethane (5 mL). The mixture was stirred for 1 h, filtered through a Celite pad with dichloromethane and extracted with dichloromethane (3 $\times$ ). The combined organic layers were dried over anhydrous  $\text{Na}_2\text{SO}_4$ , filtered, evaporated, and purified by silica gel column chromatography (hexane/AcOEt = 1/1, AcOEt only, then  $\text{CH}_2\text{Cl}_2/\text{EtOH}$  = 10/1) to give keto amide **3f** [13.9 mg, 27%, 22% ee ( $S$ )]. On the other hand, the acidic aqueous layer (pH ca. 3) was basified with saturated aq.  $\text{NaHCO}_3$  (pH ca. 9) and extracted with dichloromethane (3 $\times$ ). The combined organic layers were dried over anhydrous  $\text{Na}_2\text{SO}_4$ , filtered, and evaporated to give pure keto amide **3f** [29.8 mg, 58%, 26% ee ( $R$ )].

The sense of the enantioselectivity of **3f** extracted from the acidic aqueous layer was opposite to that of **3f** extracted from the basic aqueous layer. The absolute configuration was assigned by analogy.

#### **(R)-N-(4-Oxo-4-phenylbutan-2-yl)acetamide (3f)**

Yellowish solid; mp 74-76 °C; TLC:  $R_f$  0.20 (hexane/AcOEt = 1/2);  $[\alpha]_D^{20} +15.5$  (c 0.995,  $\text{CHCl}_3$ ) for 26% ee ( $R$ );  $^1\text{H-NMR}$  (400 MHz,  $\text{CDCl}_3$ )  $\delta$  1.29 (d,  $J$  = 6.4 Hz, 3H), 1.96 (s, 3H), 3.09 (dd,  $J$  = 16.5, 6.4 Hz, 1H), 3.34 (brd,  $J$  = 16.5, 4.1 Hz, 1H), 4.47 (dddq,  $J$  = 7.1, 6.9, 6.4, 4.1 Hz, 1H), 6.32 (brd,  $J$  = 7.1 Hz, 1H), 7.47 (apparent t,  $J$  = 7.8 Hz, 2H), 7.58 (apparent t,  $J$  = 7.3 Hz, 1H), 7.96 (apparent d,  $J$  = 8.3 Hz, 2H), 7.25-7.97 (m, 5H);  $^{13}\text{C-NMR}$  (100 MHz,  $\text{CDCl}_3$ )  $\delta$  19.9, 23.4, 42.4, 43.4, 128.04, 128.65, 133.4, 136.7, 169.4, 199.2; HPLC (CHIRALPAK AS-H, 0.46 cm $\phi$   $\times$  25cmL, hexane/2-propanol = 29/1, flow rate 1.0 mL/min, UV detection at 254 nm):  $t_R$  = 13.6 min ( $S$ , minor), 19.2 min ( $R$ , major).

The formation of oxazine **2f** was confirmed by quenching the reaction mixture (another batch of the reaction) with deuterium oxide. After removal of the precipitates by filtration, the acidic deuterium oxide layer was washed with dichloromethane (3 $\times$ ) and checked directly by  $^1\text{H}$  and  $^{13}\text{C}$  NMR analyses (for the spectra, see page S-21).

### (*R*)-2-Methyl-4-methyl-6-phenyl-4*H*-1,3-oxazine (**2f**)

<sup>1</sup>H-NMR (400 MHz, D<sub>2</sub>O) δ 1.44 (d, *J* = 6.8 Hz, 3H), 2.40 (s, 3H), 4.34 (dq, *J* = 9.6, 6.8 Hz, 1H), 5.99 (d, *J* = 9.6 Hz, 1H), 7.21-7.28 (m, 3H), 7.31-7.37 (m, 2H); <sup>13</sup>C-NMR (100 MHz, D<sub>2</sub>O, MeOH was used as an internal standard) δ 19.0, 20.7, 44.5, 114.8, 125.6, 129.6, 130.6, 133.2, 149.9, 173.0.

### Transformations of 4*H*-1,3-Oxazine **2e**

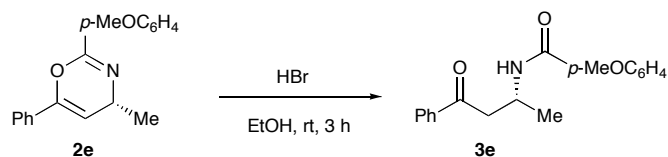

**Hydrolysis:** To a solution of **2e** [28.1 mg, 0.10 mmol, 81% ee (*R*)] in dry ethanol (1.0 mL) was added dropwise 47 % HBr (0.1 mL) at rt. The reaction was stirred at rt for 3 h and quenched with saturated aqueous NaHCO<sub>3</sub>. The mixture was extracted with dichloromethane (3×). The combined organic layers were dried over anhydrous Na<sub>2</sub>SO<sub>4</sub>, filtered, evaporated, and purified by silica gel column chromatography (hexane/AcOEt = 2/1) to give keto amide **3e** [23.3 mg, 78%, 81% ee (*R*)].

### (*R*)-4-Methoxy-*N*-(4-oxo-4-phenylbutan-2-yl)benzamide (**3e**)

For physical data, see page S-11. [ $\alpha$ ]<sup>30</sup><sub>D</sub> -12.8 (c 0.795, CHCl<sub>3</sub>) for 81% ee (*R*); HPLC (CHIRALPAK AD-H, 0.46 cm $\phi$  × 25cmL, hexane/2-propanol = 19/1, flow rate 1.0 mL/min, UV detection at 254 nm): *t*<sub>R</sub> = 71.5 min (*S*, minor), 75.0 min (*R*, major).

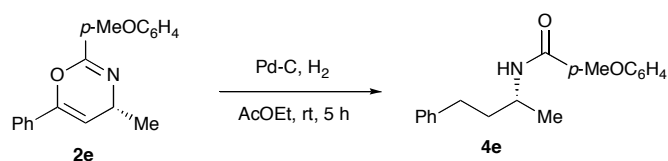

**Reduction:** A suspension of **2e** [26.8 mg, 0.096 mmol, 81% ee (*R*)] and 10% Pd/C (5.4 mg) in AcOEt (1.9 mL) was stirred at rt for 5 h under hydrogen atmosphere. The mixture was filtered through a Celite pad with AcOEt, evaporated, and purified by silica gel column chromatography (hexane/AcOEt = 3/1 ~ 2/1) to give amide **4e** [24.5 mg, 90%, 81% ee (*R*)].

### (*R*)-4-Methoxy-*N*-(4-phenylbutan-2-yl)benzamide (**4e**)

Colorless solid; mp 119-121 °C; TLC: *R*<sub>f</sub> 0.32 (hexane/AcOEt = 2/1); [ $\alpha$ ]<sup>21</sup><sub>D</sub> -8.3 (c 0.915, CHCl<sub>3</sub>) for 81% ee (*R*); IR (KBr, cm<sup>-1</sup>) 3313, 2964, 2926, 2860, 1630, 1608, 1537, 1508, 1300, 1254, 1182, 1028, 843, 702, 700; <sup>1</sup>H-NMR (400 MHz, CDCl<sub>3</sub>) δ 1.27 (d, *J* = 6.4 Hz, 3H), 1.89 (dt, *J* = 6.4, 7.8 Hz, 2H), 2.72 (t, *J* = 7.8 Hz, 2H), 3.84 (s, 3H), 4.27 (dtq, *J* = 7.8, 6.4, 6.4 Hz, 1H), 5.85 (brd, *J* = 7.8 Hz, 1H), 6.89 (apparent d, *J* = 8.7 Hz, 2H), 7.14-7.30 (m,

5H), 7.65 (apparent d,  $J = 8.7$  Hz, 2H);  $^{13}\text{C}$ -NMR (100 MHz,  $\text{CDCl}_3$ )  $\delta$  21.1, 32.5, 38.6, 45.6, 55.4, 113.6, 125.9, 127.1, 128.32, 128.46, 128.54, 141.8, 162.0, 166.3; HRMS (FAB) calcd. for  $\text{C}_{18}\text{H}_{22}\text{NO}_2$  ( $\text{M}+\text{H}^+$ ) 284.1651, found 284.1628; HPLC (CHIRALPAK AD-H, 0.46 cm $\phi$   $\times$  25cmL, hexane/2-propanol = 9/1, flow rate 1.0 mL/min, UV detection at 254 nm):  $t_R = 19.5$  min ( $R$ , major), 23.1 min ( $S$ , minor).

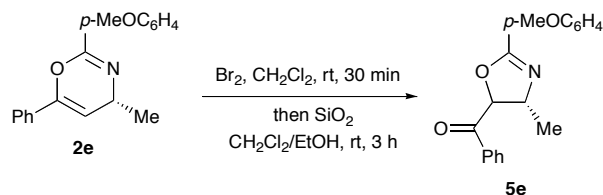

**Oxidation:** To a solution of **2e** [31.7 mg, 0.11 mmol, 81% ee ( $R$ )] in dry dichloromethane (1.1 mL) was added dropwise bromine (0.76 M solution in dichloromethane, 0.3 mL) at rt. The reaction was stirred for 30 min and quenched with water. After being stirred for 5 min, the mixture was transferred to a separation funnel, basified with saturated aqueous  $\text{NaHCO}_3$ , and extracted with dichloromethane (3 $\times$ ). The combined organic layers were dried over anhydrous  $\text{Na}_2\text{SO}_4$ , filtered, and evaporated. The residue was then diluted with dichloromethane (2 mL) and ethanol (0.4 mL). Silica gel (ca. 300 mg) was added to the solution. The mixture was stirred for 3 h, evaporated, and charged directly on a silica gel column for chromatography (hexane/AcOEt = 3/1  $\sim$  1/1 then  $\text{CH}_2\text{Cl}_2/\text{EtOH} = 20/1$ ; **5e** was partially crystallized in the silica gel column. Therefore, elution with  $\text{CH}_2\text{Cl}_2/\text{EtOH}$  was needed) to give *trans*-**5e** (4.7 mg, 14%, 81% ee) and *cis*-**5e** (24.1 mg, 72%, 81% ee).

The relative configurations were assigned based on the coupling constants between H4 and H5 protons (*trans*-**5e**: 6.4 Hz, *cis*-**5e**: 10.5 Hz).

**(4*R*,5*S*)-5-Benzoyl-2-(4-methoxyphenyl)-4-methyl-4,5-dihydrooxazole (*trans*-**5e**)**

Viscous oil; TLC:  $R_f$  0.31 (hexane/AcOEt = 2/1); IR (neat,  $\text{cm}^{-1}$ ) 2970, 2933, 2839, 1695, 1653, 1608, 1514, 1257, 1173, 1028, 841, 692;  $^1\text{H}$ -NMR (400 MHz,  $\text{CDCl}_3$ )  $\delta$  1.55 (d,  $J = 6.9$  Hz, 3H), 3.86 (s, 3H), 4.50 (dq,  $J = 6.9, 6.4$  Hz, 1H), 5.38 (d,  $J = 6.4$  Hz, 1H), 6.93 (apparent d,  $J = 8.7$  Hz, 2H), 7.53 (apparent t,  $J = 7.8$  Hz, 2H), 7.65 (apparent t,  $J = 7.3$  Hz, 1H), 7.93-8.02 (m, 4H); HRMS (FAB) calcd. for  $\text{C}_{18}\text{H}_{18}\text{NO}_3$  ( $\text{M}+\text{H}^+$ ) 296.1287, found 296.1292; HPLC (CHIRALPAK AD-H, 0.46 cm $\phi$   $\times$  25cmL, hexane/2-propanol = 4/1, flow rate 0.4 mL/min, UV detection at 254 nm):  $t_R = 46.0$  min (4*S*,5*R*, minor), 49.1 min (4*R*,5*S*, major).

**(4*R*,5*R*)-5-Benzoyl-2-(4-methoxyphenyl)-4-methyl-4,5-dihydrooxazole (*cis*-**5e**)**

Colorless solid; mp 127-129  $^\circ\text{C}$ ; TLC:  $R_f$  0.19 (hexane/AcOEt = 2/1);  $[\alpha]_D^{22} +210.2$  (c 0.245,  $\text{CHCl}_3$ ) for 81% ee (4*R*,5*R*); IR (KBr,  $\text{cm}^{-1}$ ) 2968, 1697, 1649, 1606, 1514, 1377, 1259, 1221, 1167, 1099, 1026, 960, 847, 694;  $^1\text{H}$ -NMR (400 MHz,  $\text{CDCl}_3$ )  $\delta$  1.08 (d,  $J = 6.9$  Hz, 3H), 3.87 (s, 3H), 4.85 (dq,  $J = 10.4, 6.9$  Hz, 1H), 5.96 (d,  $J = 10.4$  Hz, 1H), 6.93 (apparent d,  $J =$

8.6 Hz, 2H), 7.53 (apparent t,  $J = 8.0$  Hz, 2H), 7.64 (apparent t,  $J = 7.4$  Hz, 1H), 7.93-8.02 (m, 4H);  $^{13}\text{C}$ -NMR (100 MHz,  $\text{CDCl}_3$ )  $\delta$  17.5, 55.4, 65.1, 83.2, 113.7, 119.4, 128.0, 129.0, 130.3, 133.9, 135.4, 162.4, 163.1, 194.5; HRMS (FAB) calcd. for  $\text{C}_{18}\text{H}_{18}\text{NO}_3$  ( $\text{M}+\text{H}^+$ ) 296.1287, found 296.1298; HPLC (CHIRALPAK AD-H, 0.46 cm $\phi$   $\times$  25cmL, hexane/2-propanol = 1/1, flow rate 0.6 mL/min, UV detection at 254 nm):  $t_R = 12.9$  min (4*S*,5*S*; minor), 48.2 min (4*R*,5*R*; major).

### Determination of the Absolute Configuration of 2e

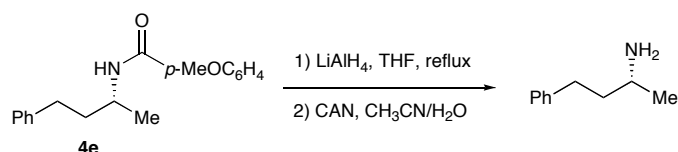

To a solution of **4e** (17.9 mg, 0.063 mmol, 81% ee) in dry THF (2.0 mL) was added LiAlH<sub>4</sub> (24.0 mg, 0.63 mmol) at rt. The reaction was refluxed for 16 h and, after cooling to rt, carefully quenched with water and 4M aq. NaOH. The mixture was extracted with dichloromethane (3 $\times$ ). The filtrate was dried over anhydrous Na<sub>2</sub>CO<sub>3</sub>, filtered, and evaporated to give crude (*R*)-*N*-(4-methoxybenzyl)-4-phenylbutan-2-amine. This crude amine was diluted with acetonitrile/water (2/1, 2 mL) and treated with CAN (173.1 mg, 0.32 mmol). The reaction was stirred at rt for 6 h and quenched with 1.0 M hydrochloric acid (5 mL). The mixture was filtered through a Celite pad with dichloromethane. The filtrate was washed with dichloromethane (4 $\times$ ) and basified with 4 M aqueous NaOH. The aqueous layer was extracted with dichloromethane (3 $\times$ ). The combined organic layers were dried over anhydrous Na<sub>2</sub>CO<sub>3</sub>, filtered, and evaporated to afford (*R*)-4-phenylbutan-2-amine (4.3 mg, 46% over 2 steps).

### (*R*)-*N*-(4-Methoxybenzyl)-4-phenylbutan-2-amine

$^1\text{H}$ -NMR (400 MHz,  $\text{CDCl}_3$ )  $\delta$  1.14 (d,  $J = 6.1$  Hz, 3H), 1.48 (brd, 1H), 1.62-1.70 (m, 1H), 1.76-1.85 (m, 1H), 2.59-2.69 (m, 2H), 2.69-2.76 (m, 1H), 3.67 (d,  $J = 12.8$  Hz, 1H), 3.76 (d,  $J = 12.8$  Hz, 1H), 3.80 (s, 3H), 6.85 (apparent d,  $J = 8.6$  Hz, 2H), 7.16-7.29 (m, 7H);  $^{13}\text{C}$ -NMR (100 MHz,  $\text{CDCl}_3$ )  $\delta$  20.3, 32.3, 38.7, 50.7, 51.9, 55.2, 113.7, 125.7, 128.31, 128.32, 129.3, 132.9, 142.4, 158.5.

### (*R*)-4-Phenylbutan-2-amine

Spectroscopic data are consistent with the literature data.<sup>9</sup>

$[\alpha]_D^{20} -8.7$  (c 0.215,  $\text{CHCl}_3$ ) for 81% ee (*R*) [*lit.*<sup>9</sup>  $[\alpha]_D^{20} +6.4$  (c 0.47,  $\text{CHCl}_3$ ) for 98% ee (*S*)];

$^1\text{H}$ -NMR (400 MHz,  $\text{CDCl}_3$ )  $\delta$  1.11 (d,  $J = 6.1$  Hz, 3H), 1.62 (brs, 2H, NH<sub>2</sub>), 1.60-1.72 (m, 2H), 2.59-2.73 (m, 2H), 2.92 (sext,  $J = 6.1$  Hz, 1H), 7.16-7.31 (m, 5H).

### <sup>1</sup>H and <sup>13</sup>C NMR Spectra of 4H-1,3-Oxazines

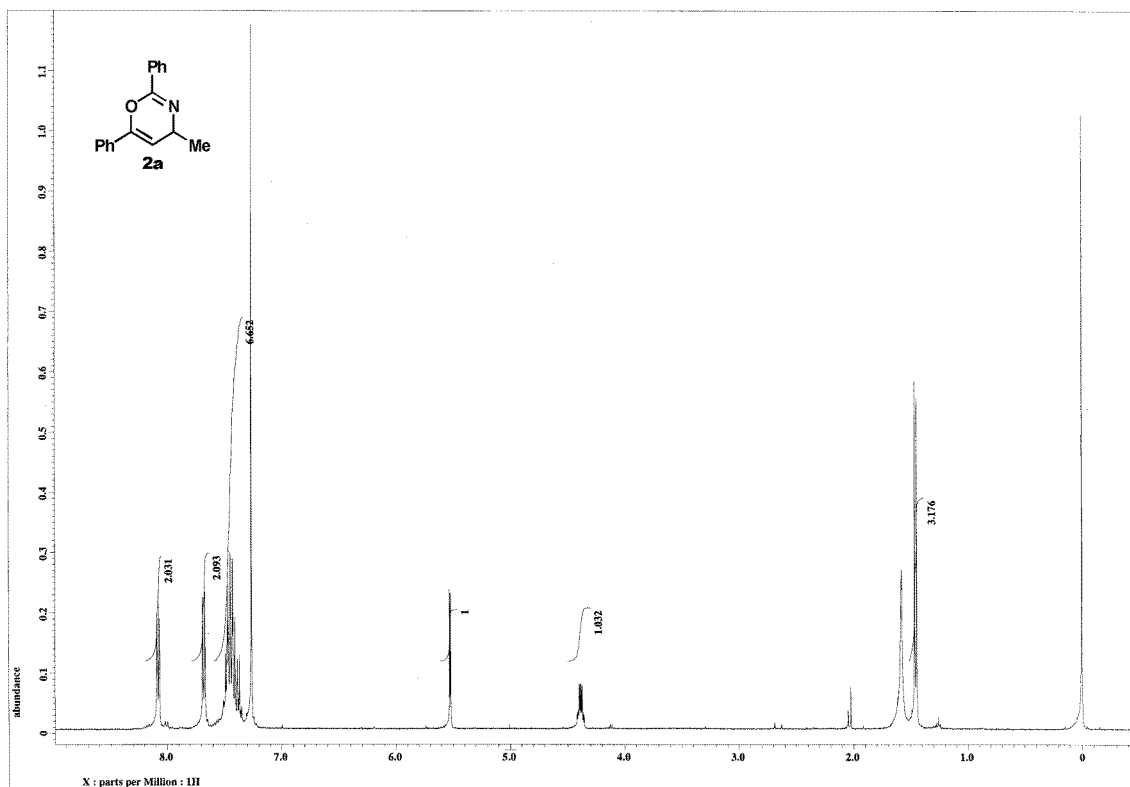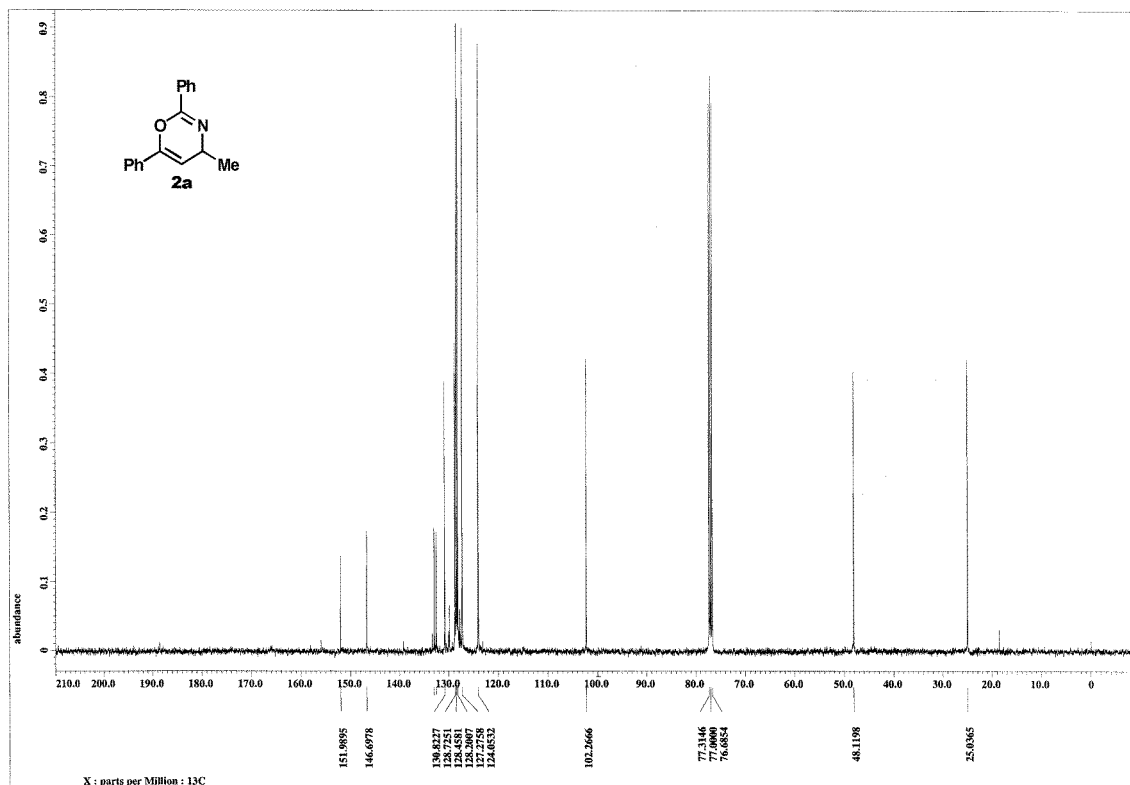



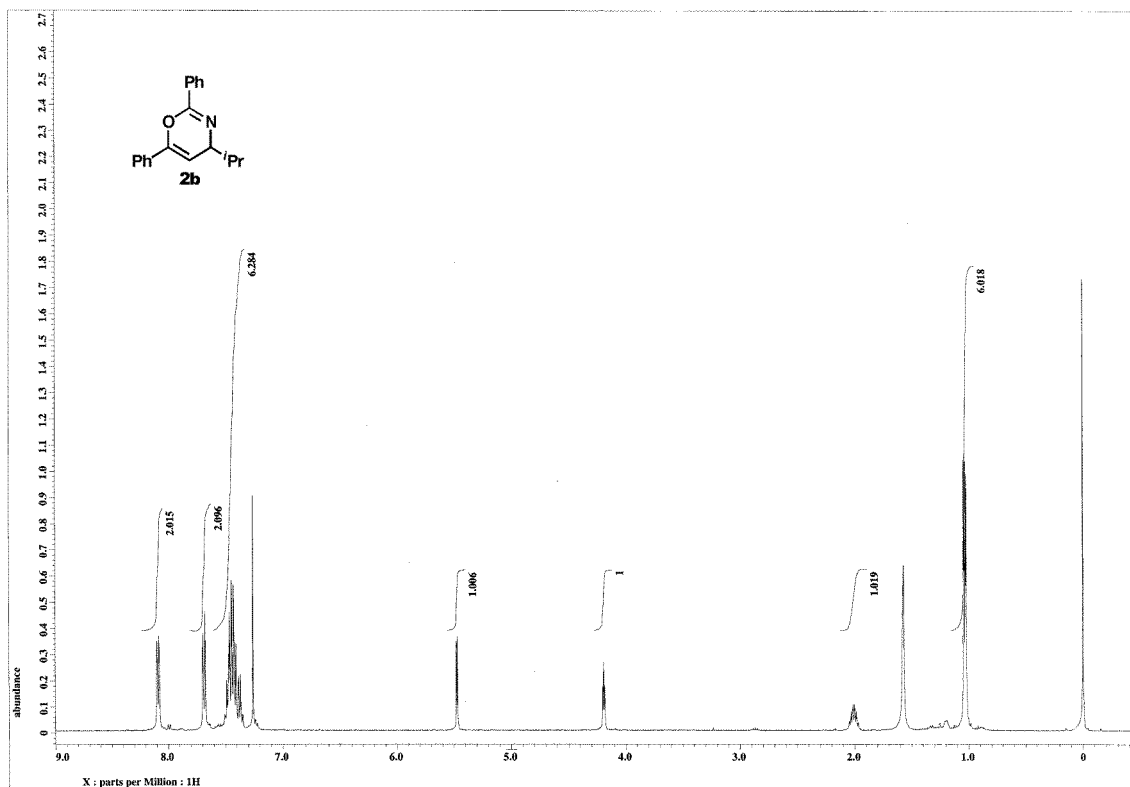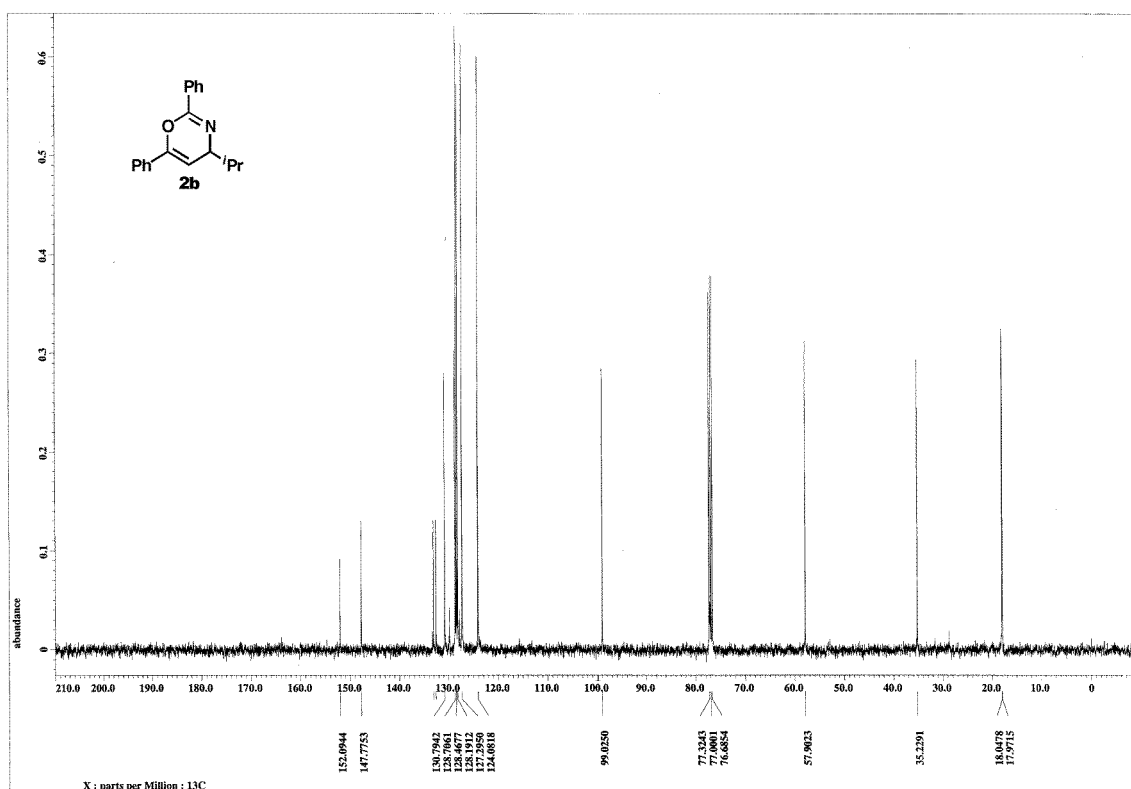

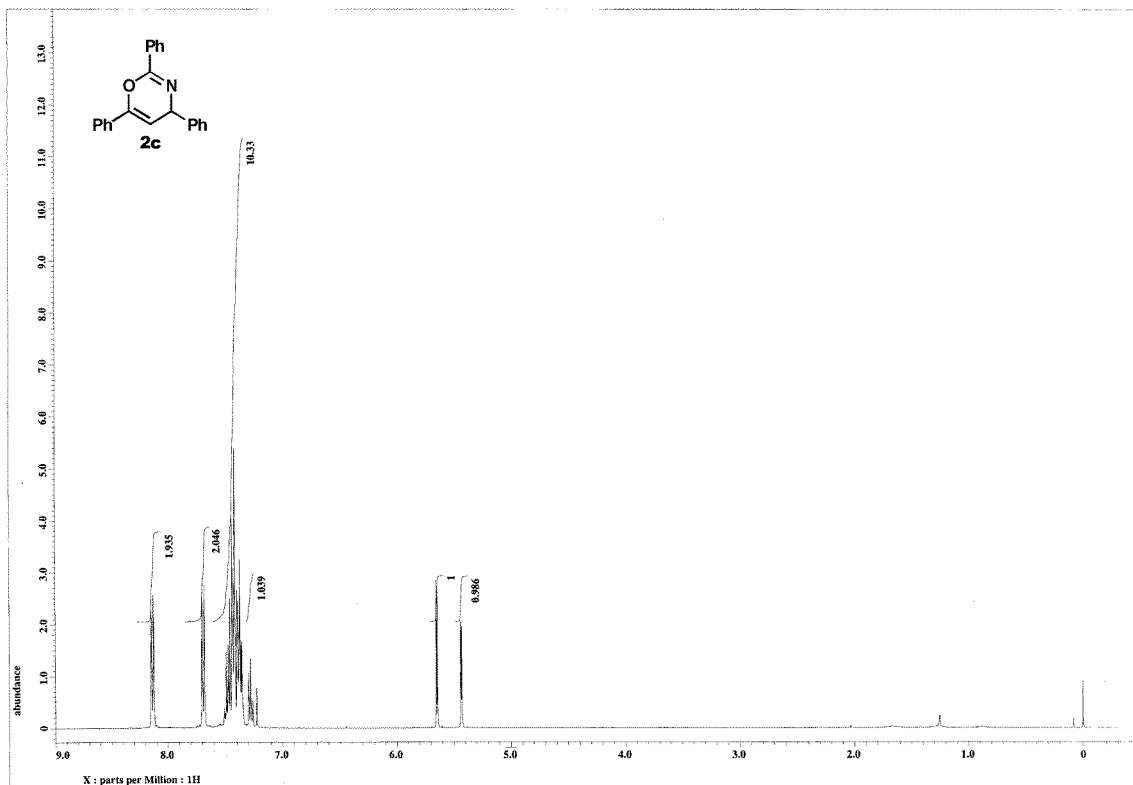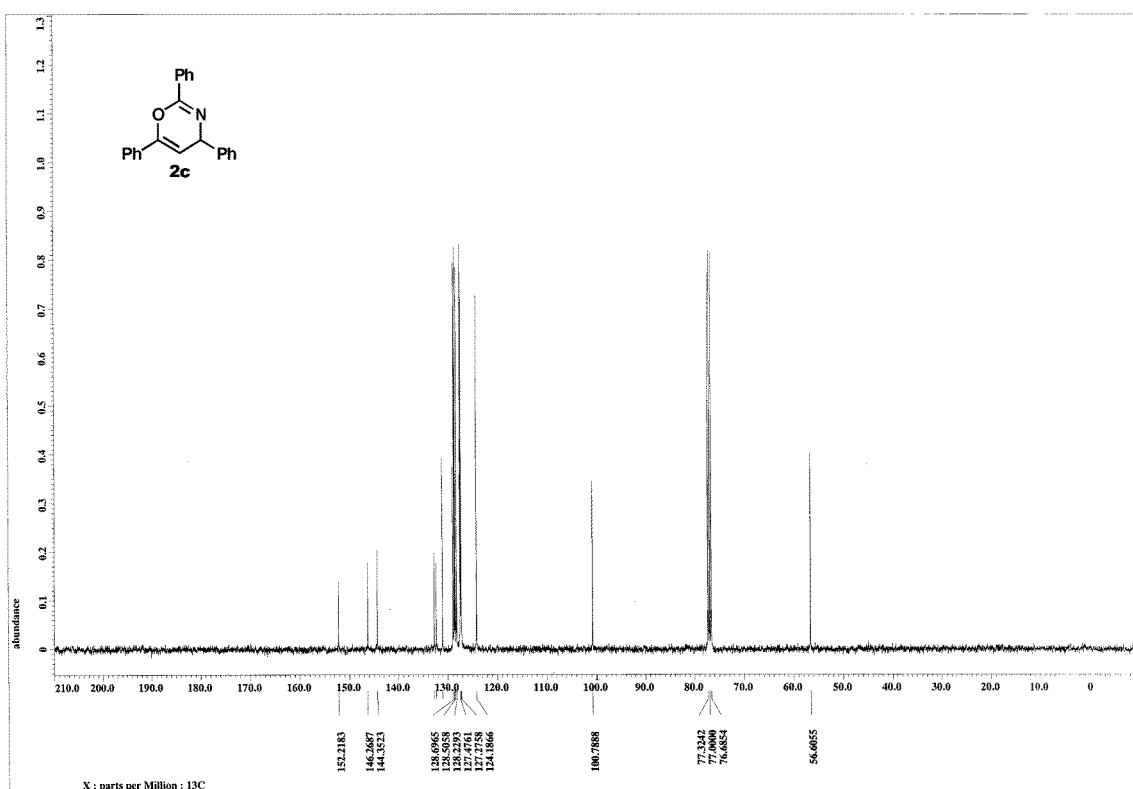

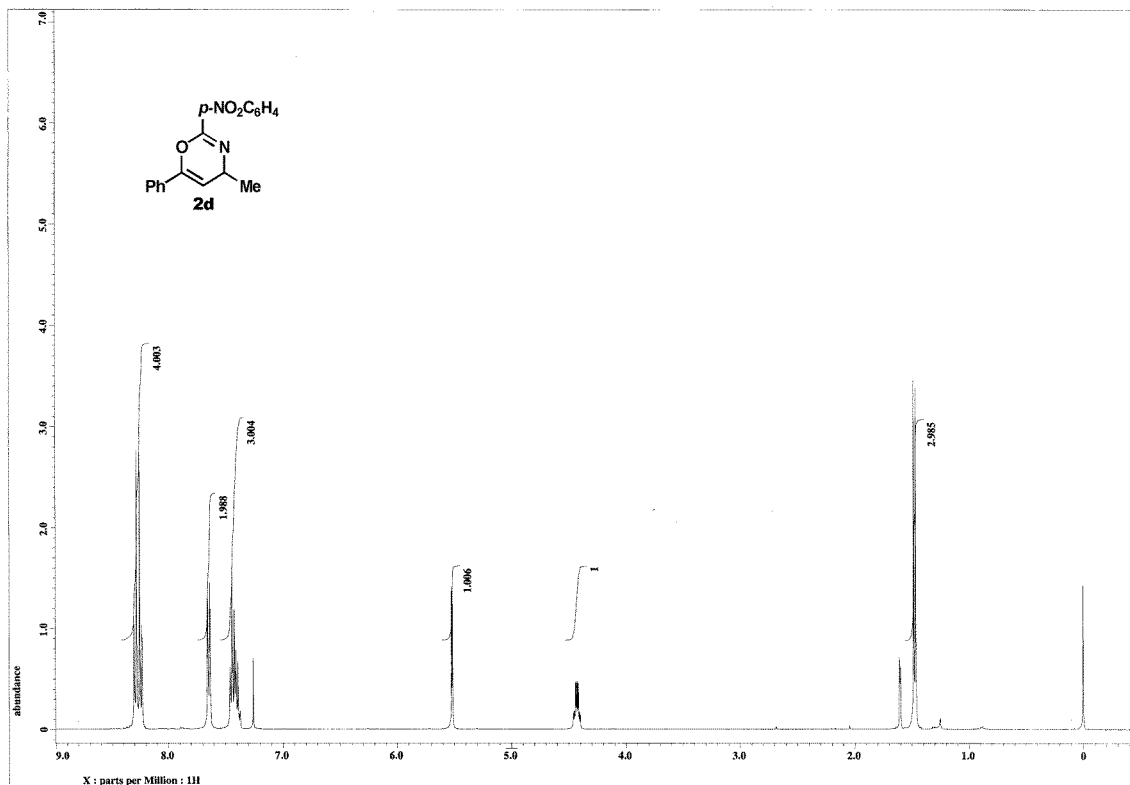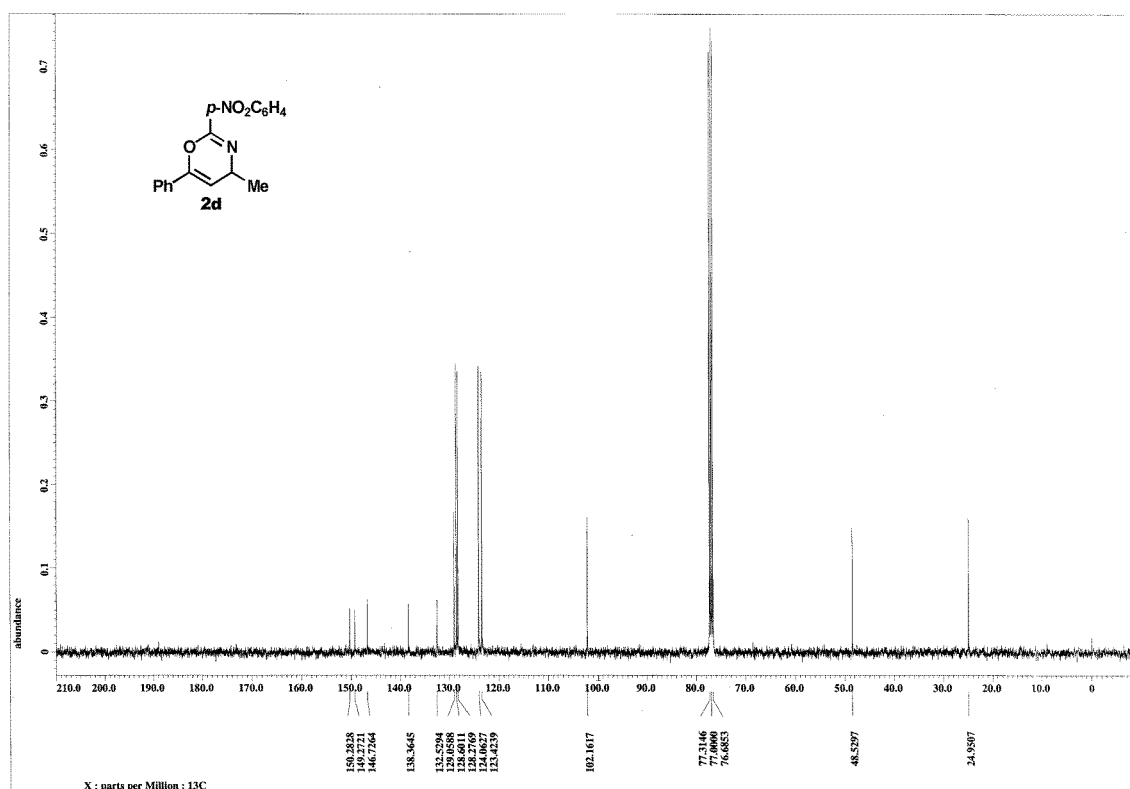

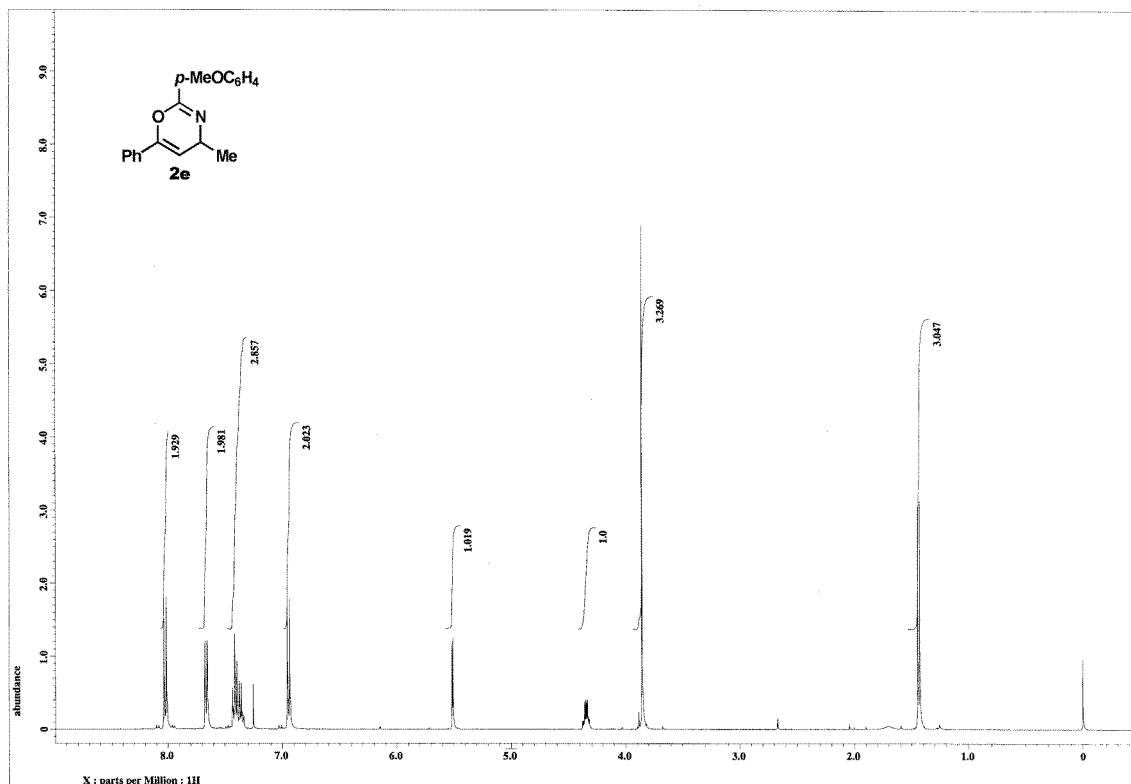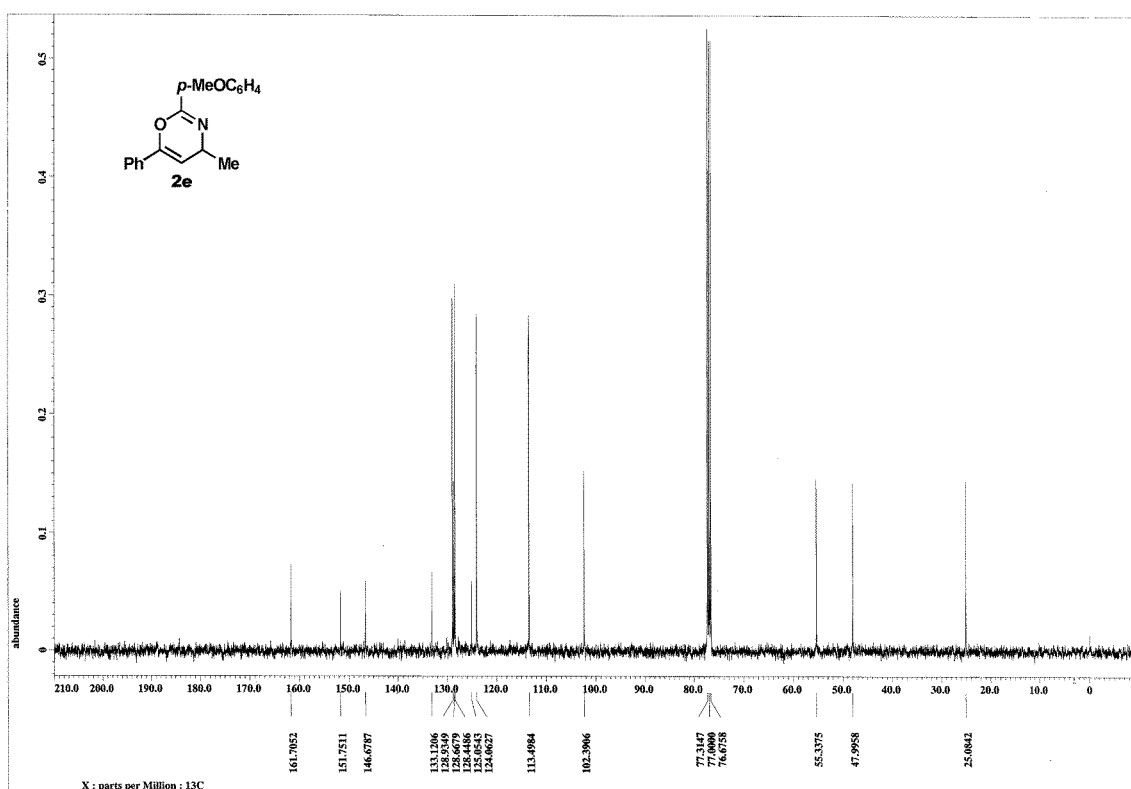

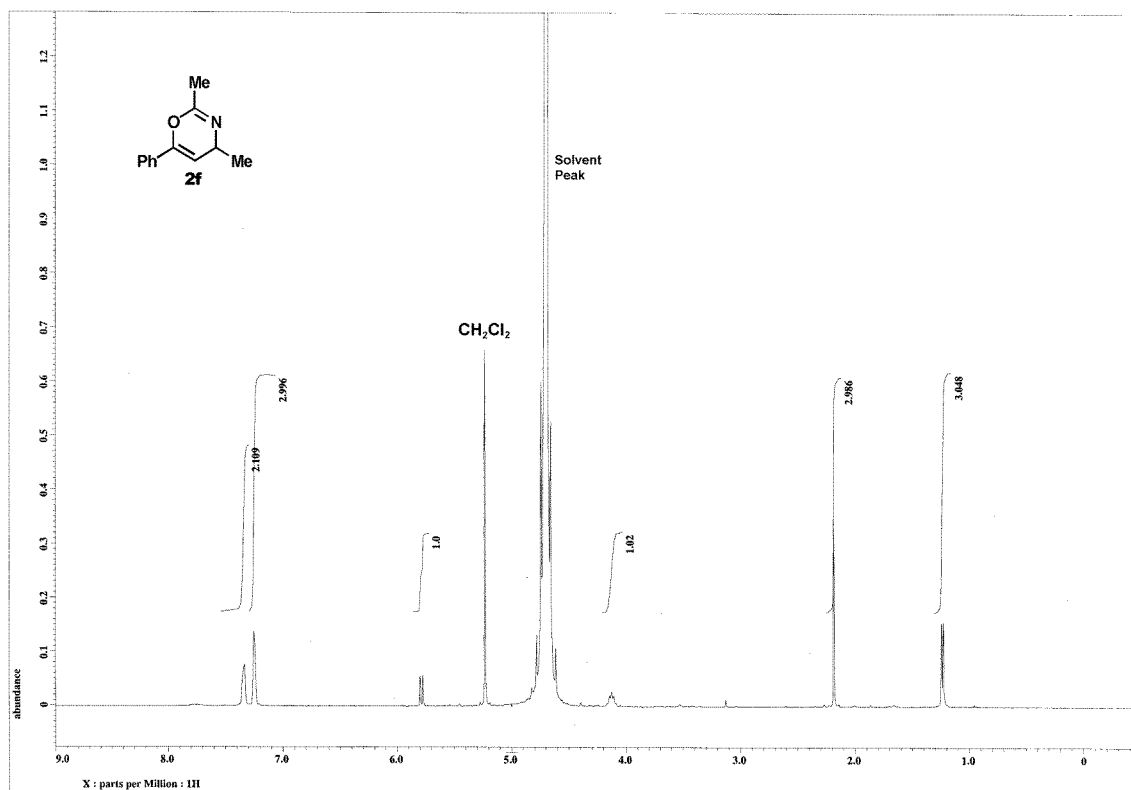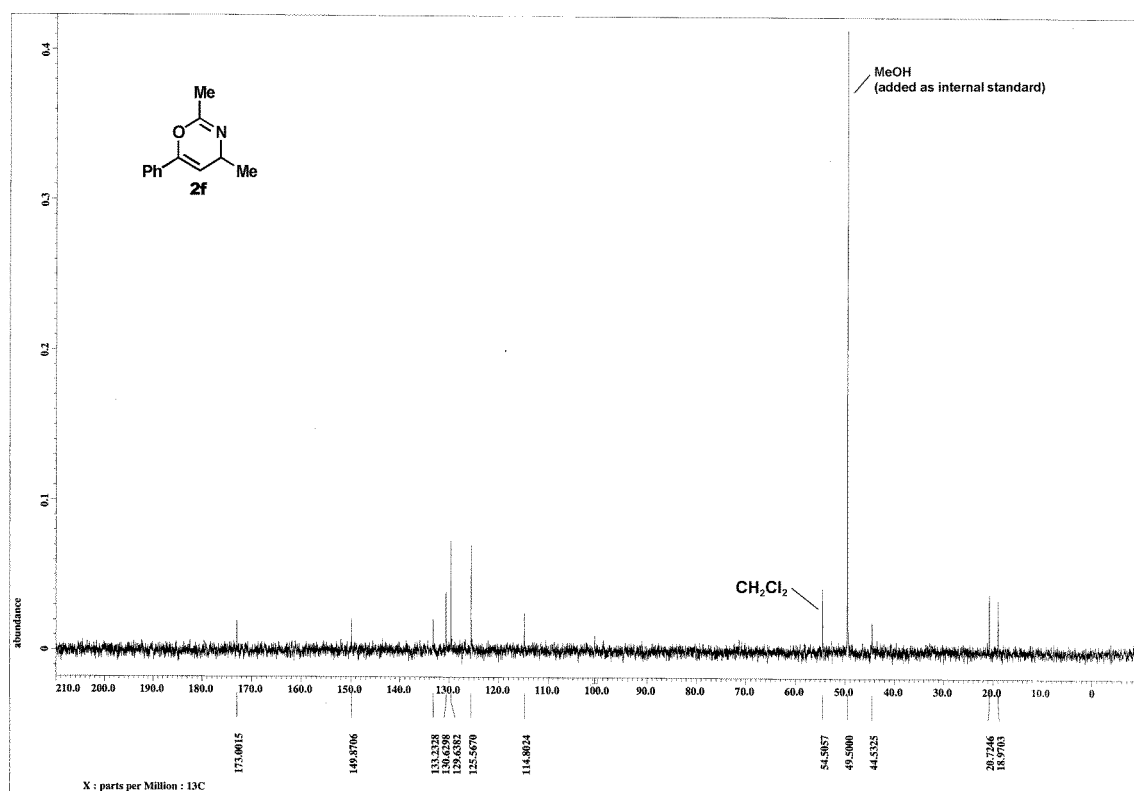

## HPLC Traces of Optically Active Compounds

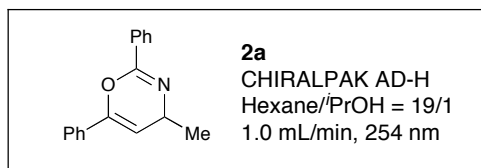

### 1. Racemic

CH. 1 C.S 2.50 ATT 8 OFFS 0 00/00/00 04:11

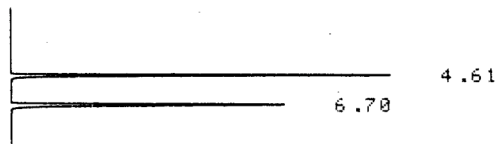

D-2500

00/00/00 04:11

METHOD: TAG: 4 CH: 1

FILE: 1 CALC-METHOD: AREA% TABLE: 0 CONC: AREA

| NO. | RT   | AREA   | CONC   | BC |
|-----|------|--------|--------|----|
| 1   | 4.61 | 614007 | 49.998 | BB |
| 2   | 6.70 | 614060 | 50.002 | BB |

TOTAL

1228067 100.000

PEAK REJ : 0

### 2. Optically active (74% ee)

CH. 1 C.S 2.50 ATT 6 OFFS 0 00/00/00 00:20

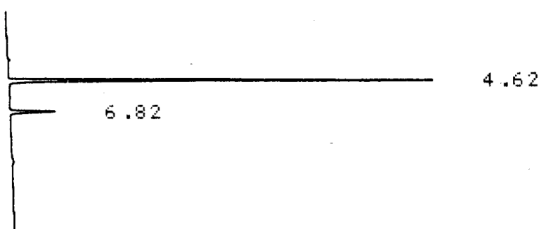

D-2500

00/00/00 00:20

METHOD: TAG: 2 CH: 1

FILE: 1 CALC-METHOD: AREA% TABLE: 0 CONC: AREA

| NO. | RT   | AREA   | CONC   | BC |
|-----|------|--------|--------|----|
| 1   | 4.62 | 174135 | 87.054 | BB |
| 2   | 6.82 | 25895  | 12.946 | BB |

TOTAL

200030 100.000

PEAK REJ : 0

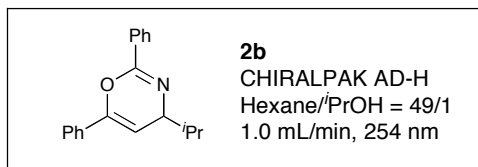

### 1. Racemic

CH. 1 C.S 2.50 ATT 8 OFFS 0 00/00/00 00:45

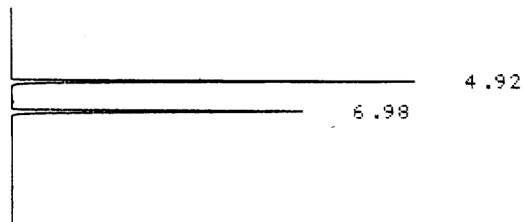

D-2500 00/00/00 00:45

METHOD: TAG: 2 CH: 1  
FILE: 1 CALC-METHOD: AREA% TABLE: 0 CONC: AREA

| NO.   | RT   | AREA    | CONC    | BC |
|-------|------|---------|---------|----|
| 1     | 4.92 | 694697  | 50.312  | BB |
| 2     | 6.98 | 686082  | 49.688  | BB |
| TOTAL |      | 1380779 | 100.000 |    |

PEAK REJ : 0

### 2. Optically active (47% ee)

CH. 1 C.S 2.50 ATT 8 OFFS 0 00/00/00 01:14

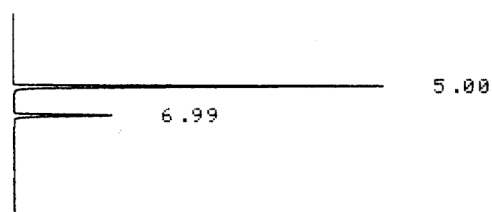

D-2500 00/00/00 01:14

METHOD: TAG: 2 CH: 1  
FILE: 1 CALC-METHOD: AREA% TABLE: 0 CONC: AREA

| NO.   | RT   | AREA   | CONC    | BC |
|-------|------|--------|---------|----|
| 1     | 5.00 | 646183 | 73.547  | BB |
| 2     | 6.99 | 232415 | 26.453  | BB |
| TOTAL |      | 878598 | 100.000 |    |

PEAK REJ : 0

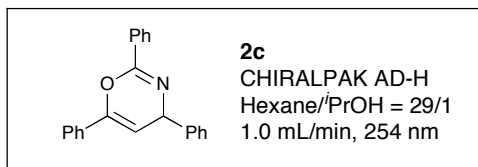

### 1. Racemic

CH. 1 C.S 2.50 ATT 6 OFFS 0 00/00/00 02:05

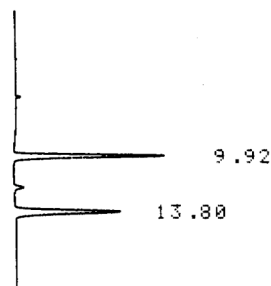

D-2500 00/00/00 02:05

METHOD: TAG: 3 CH: 1

FILE: 1 CALC-METHOD: AREA% TABLE: 0 CONC: AREA

| NO.        | RT    | AREA   | CONC    | BC |
|------------|-------|--------|---------|----|
| 1          | 9.92  | 129911 | 49.917  | BB |
| 2          | 13.80 | 130344 | 50.083  | BB |
| TOTAL      |       | 260255 | 100.000 |    |
| PEAK REJ : |       | 0      |         |    |

### 2. Optically active [53% ee (S)]

C-RSA CHROMATOPAC CH=1 Report No.=3 DATA=1:@CHRM1.C00 09/02/20 12:48:14

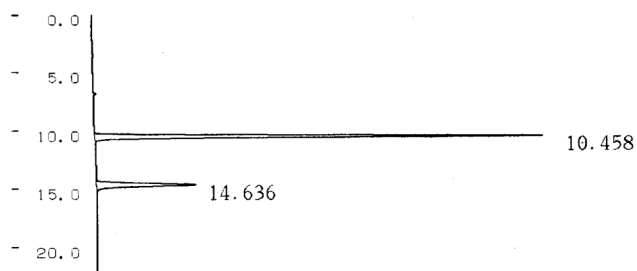

\*\* CALCULATION REPORT \*\*

| CH    | PKNO | TIME   | AREA   | HEIGHT | MK | IDNO | CONC    | NAME |
|-------|------|--------|--------|--------|----|------|---------|------|
| 1     | 2    | 10.458 | 494122 | 35604  |    |      | 76.4374 |      |
|       | 3    | 14.636 | 152318 | 7917   |    |      | 23.5626 |      |
| TOTAL |      |        | 646440 | 43521  |    |      | 100     |      |



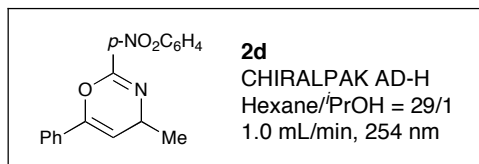

## 1. Racemic

C-R8A CHROMATOPAC CH=1 Report No.=8 DATA=1:@CHRM1.C00 09/02/09 18:31:18

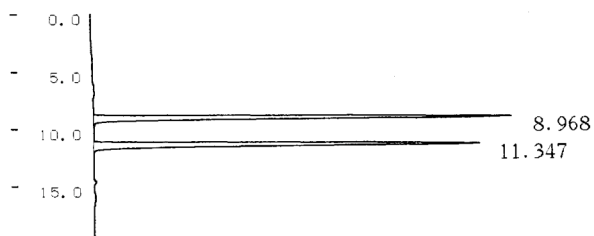

\*\* CALCULATION REPORT \*\*

| CH    | PKNO | TIME   | AREA    | HEIGHT | MK | IDNO | CONC    | NAME |
|-------|------|--------|---------|--------|----|------|---------|------|
| 1     | 4    | 8.968  | 1227585 | 66346  |    |      | 50.0402 |      |
|       | 5    | 11.347 | 1225614 | 61370  |    |      | 49.9598 |      |
| TOTAL |      |        | 2453198 | 127715 |    |      | 100     |      |

## 2. Optically active (50% ee)

CH. 1 C.S 2.50 ATT 6 OFFS 0 00/00/00 01:04

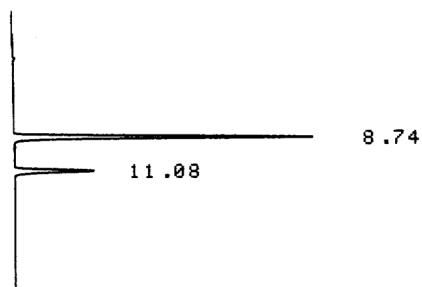

D-2500

00/00/00 01:04

METHOD: TAG: 2 CH: 1

FILE: 1 CALC-METHOD: AREA% TABLE: 0 CONC: AREA

| NO.        | RT    | AREA   | CONC    | BC |
|------------|-------|--------|---------|----|
| 1          | 8.74  | 219736 | 74.971  | BB |
| 2          | 11.08 | 73360  | 25.029  | BB |
| TOTAL      |       | 293096 | 100.000 |    |
| PEAK REJ : |       | 0      |         |    |

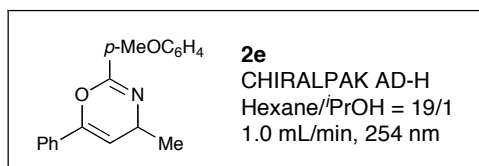

## 1. Racemic

CH. 1 C.S 1.25 ATT 7 OFFS 0 00/00/00 03:13

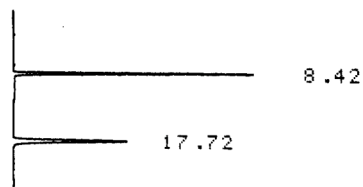

D-2500 00/00/00 03:13

METHOD: TAG: 3 CH: 1

FILE: 1 CALC-METHOD: AREA% TABLE: 0 CONC: AREA

| NO.        | RT    | AREA   | CONC    | BC |
|------------|-------|--------|---------|----|
| 1          | 8.42  | 344879 | 50.077  | BB |
| 2          | 17.72 | 343816 | 49.923  | BB |
| TOTAL      |       | 688695 | 100.000 |    |
| PEAK REJ : |       | 0      |         |    |

## 2. Optically active [81% ee (*R*)]

CH. 1 C.S 1.25 ATT 8 OFFS 0 00/00/00 00:44

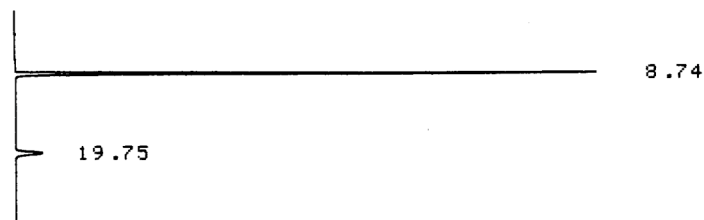

D-2500 00/00/00 00:44

METHOD: TAG: 2 CH: 1

FILE: 1 CALC-METHOD: AREA% TABLE: 0 CONC: AREA

| NO.        | RT    | AREA    | CONC    | BC |
|------------|-------|---------|---------|----|
| 1          | 8.74  | 1775558 | 90.353  | BB |
| 2          | 19.75 | 189584  | 9.647   | BB |
| TOTAL      |       | 1965142 | 100.000 |    |
| PEAK REJ : |       | 0       |         |    |

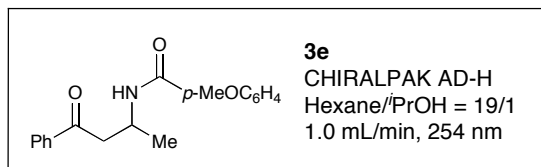

## 1. Racemic

CH. 1 C.S 1.25 ATT 8 OFFS 0 00/00/00 08:54

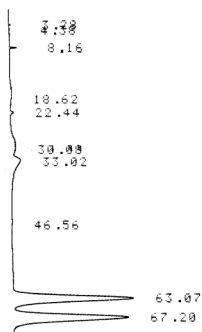

D-2500

00/00/00 08:54

METHOD: TAG: 10 CH: 1

FILE: 1 CALC-METHOD: AREA% TABLE: 0 CONC: AREA

| NO.        | RT    | AREA     | CONC    | BC |
|------------|-------|----------|---------|----|
| 1          | 3.28  | 4667     | 0.045   | BB |
| 2          | 4.38  | 1106     | 0.011   | BB |
| 3          | 8.16  | 32105    | 0.310   | BB |
| 4          | 18.62 | 96053    | 0.929   | BB |
| 5          | 22.44 | 36463    | 0.353   | BB |
| 6          | 30.08 | 243532   | 2.354   | BU |
| 7          | 33.02 | 547857   | 5.297   | UB |
| 8          | 46.56 | 16521    | 0.160   | BB |
| 9          | 63.07 | 4611172  | 44.579  | BU |
| 10         | 67.20 | 4754272  | 45.963  | UB |
| TOTAL      |       | 10343748 | 100.000 |    |
| PEAK REJ : |       | 0        |         |    |

## 2. Optically active [81% ee (R)]

CH. 1 C.S 1.25 ATT 5 OFFS 0 00/00/00 00:35

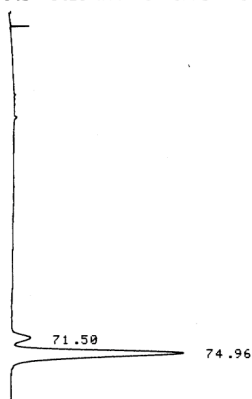

D-2500

00/00/00 00:35

METHOD: TAG: 2 CH: 1

FILE: 1 CALC-METHOD: AREA% TABLE: 0 CONC: AREA

| NO.        | RT    | AREA    | CONC    | BC |
|------------|-------|---------|---------|----|
| 1          | 71.50 | 101233  | 9.322   | BU |
| 2          | 74.96 | 984713  | 90.678  | UB |
| TOTAL      |       | 1085946 | 100.000 |    |
| PEAK REJ : |       | 0       |         |    |

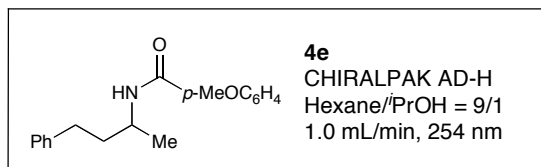

### 1. Racemic

CH. 1 C.S 1.25 ATT 8 OFFS 0 00/00/00 01:47

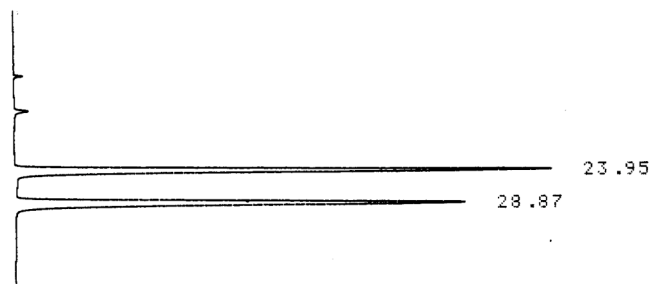

D-2500 00/00/00 01:47

METHOD: TAG: 3 CH: 1

FILE: 1 CALC-METHOD: AREA% TABLE: 0 CONC: AREA

| NO. | RT    | AREA    | CONC   | BC |
|-----|-------|---------|--------|----|
| 1   | 23.95 | 6179755 | 49.991 | BB |
| 2   | 28.87 | 6182022 | 50.009 | BB |

TOTAL

12361777 100.000

PEAK REJ : 0

### 2. Optically active [81% ee (*R*)]

CH. 1 C.S 1.25 ATT 7 OFFS 0 00/00/00 02:33

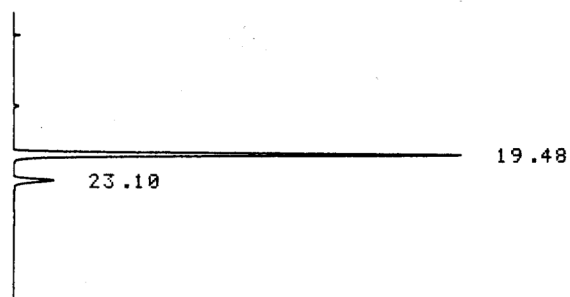

D-2500 00/00/00 02:33

METHOD: TAG: 3 CH: 1

FILE: 1 CALC-METHOD: AREA% TABLE: 0 CONC: AREA

| NO. | RT    | AREA    | CONC   | BC |
|-----|-------|---------|--------|----|
| 1   | 19.48 | 1731279 | 90.561 | BB |
| 2   | 23.10 | 180442  | 9.439  | BB |

TOTAL

1911721 100.000

PEAK REJ : 0

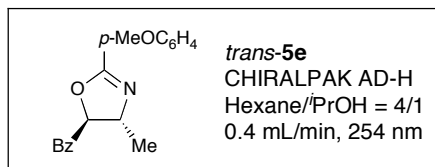

### 1. Racemic

CH. 1 C.S 1.25 ATT 7 OFFS 0 00/00/00 03:53

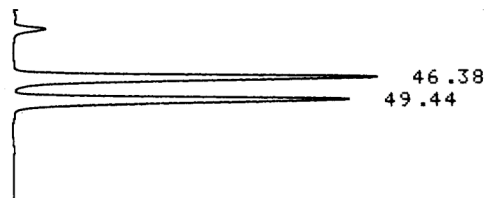

D-2500

00/00/00 03:53

METHOD: TAG: 4 CH: 1

FILE: 1 CALC-METHOD: AREA% TABLE: 0 CONC: AREA

| NO.        | RT    | AREA    | CONC    | BC |
|------------|-------|---------|---------|----|
| 1          | 46.38 | 2727637 | 51.050  | BV |
| 2          | 49.44 | 2615401 | 48.950  | VB |
| TOTAL      |       | 5343038 | 100.000 |    |
| PEAK REJ : |       | 0       |         |    |

### 2. Optically active [81% ee (4R, 5S)]

CH. 1 C.S 1.25 ATT 7 OFFS 0 00/00/00 02:43

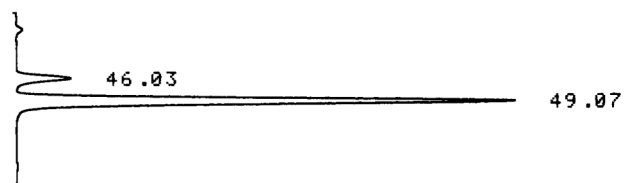

D-2500

00/00/00 02:43

METHOD: TAG: 3 CH: 1

FILE: 1 CALC-METHOD: AREA% TABLE: 0 CONC: AREA

| NO.        | RT    | AREA    | CONC    | BC |
|------------|-------|---------|---------|----|
| 1          | 46.03 | 404548  | 9.505   | BV |
| 2          | 49.07 | 3851608 | 90.495  | VB |
| TOTAL      |       | 4256156 | 100.000 |    |
| PEAK REJ : |       | 0       |         |    |

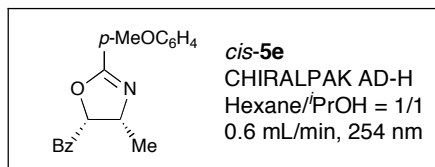

## 1. Racemic

C-R8A CHROMATOPAC CH=1 Report No.=7 DATA=1:@CHRM1.C00 09/02/18 14:47:26

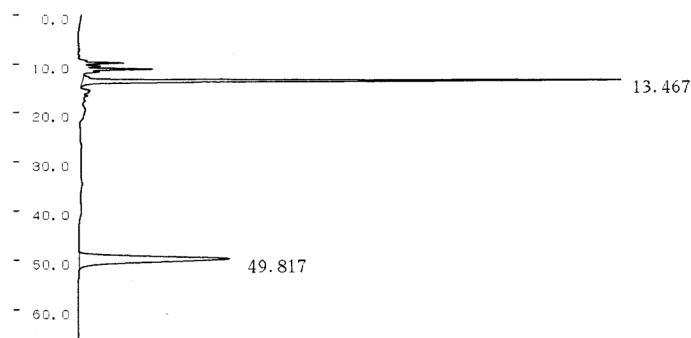

\*\* CALCULATION REPORT \*\*

| CH    | PKNO | TIME   | AREA    | HEIGHT | MK | IDNO | CONC    | NAME |
|-------|------|--------|---------|--------|----|------|---------|------|
| 1     | 7    | 13.467 | 1275274 | 50096  |    |      | 54.8455 |      |
|       | 10   | 49.817 | 1049936 | 14057  |    |      | 45.1545 |      |
| TOTAL |      |        | 2325209 | 64153  |    |      | 100     |      |

## 2. Optically active [81% ee (4R, 5R)]

CH. 1 C.S 1.25 ATT 8 OFFS 0 00/00/00 04:10

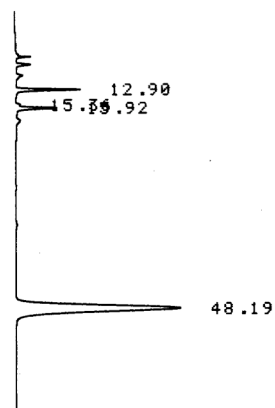

D-2500

00/00/00 04:10

METHOD: TAG: 4 CH: 1

FILE: 1 CALC-METHOD: AREA% TABLE: 0 CONC: AREA

| NO.        | RT    | AREA    | CONC    | BC   |
|------------|-------|---------|---------|------|
| 1          | 12.90 | 400352  | 8.707   | BB ← |
| 2          | 15.36 | 29384   | 0.639   | BU ← |
| 3          | 15.92 | 321861  | 7.000   | VB ← |
| 4          | 48.19 | 3846702 | 83.655  | BB ← |
| TOTAL      |       | 4598299 | 100.000 |      |
| PEAK REJ : |       | 0       |         |      |

## References

- (1) S. Kotani, S. Hashimoto and M. Nakajima, *Tetrahedron* 2007, **63**, 3122.
- (2) M. Nakajima, Y. Sasaki, M. Shiro and S. Hashimoto, *Tetrahedron: Asymmetry* 1997, **8**, 341.
- (3) Y. K. Ramtohul and A. Chartrand, *Org. Lett.* 2007, **9**, 1029.
- (4) Prepared from 4-methyl-2-butanone and methyl benzoate according to the literature procedure, see: T. Ishikawa, R. Kadoya, M. Arai, H. Takahashi, Y. Kaisi, T. Mizuta, K. Yoshikai, S. Saito, *J. Org. Chem.* 2001, **66**, 8000.
- (5) R. F. Klima, A. V. Jadhav, P. N. D. Singh, M. Chang, C. Vanos, J. Sankaranarayanan, M. Vu, N. Ibrahim, E. Ross, S. McCloskey, R. S. Murthy, J. A. Krause, B. S. Ault, and A. D. Gudmundsdóttir, *J. Org. Chem.* 2007, **72**, 6372.
- (6) Y.-D. Lin, J.-Q. Kao and C.-T. Chen, *Org. Lett.* 2007, **9**, 5195.
- (7) M. Terada, K. Machioka and K. Sorimachi, *Angew. Chem. Int. Ed.* 2006, **45**, 2254.
- (8) H.-H. Li, D.-J. Dong and S.-K. Tian, *Eur. J. Org. Chem.* 2008, 3623.
- (9) (a) K. Masutani, T. Minowa, Y. Hagiwara and T. Mukaiyama, *Bull. Chem. Soc. Jpn.* 2006, **79**, 1106. (b) J. González-Sabín, V. Gotor and F. Rebolledo, *Tetrahedron: Asymmetry* 2002, **13**, 1315.
